# Supplementary material for: Observation of reactive intermediates in the initial stage during ethene conversion over acidic zeolites
Source: Royal Society of Chemistry journal article supplement (doi:10.1039/d3cy00709j), 2023-01-01
Supplement: d3cy00709j1.pdf [file d3cy00709j1.pdf]

DFT-optimized structures in "xyz" chemical file format.

Line one and two indicate the number of atoms the label name of structures, respectively,  
with xyz coordnates followed below.

145

structure H-Y model

|    |          |          |          |
|----|----------|----------|----------|
| Si | 18.85450 | 12.64948 | 13.89203 |
| Si | 21.30220 | 4.10120  | 4.79948  |
| Si | 15.72552 | 17.26809 | 7.30898  |
| Si | 10.18757 | 9.43641  | 4.80005  |
| Si | 18.80781 | 7.29370  | 13.83633 |
| Si | 15.75840 | 15.50495 | 2.27085  |
| Si | 24.39402 | 7.65284  | 7.28997  |
| Si | 22.83767 | 8.54141  | 2.26482  |
| Si | 11.73153 | 4.95278  | 7.32276  |
| Si | 20.37670 | 16.39959 | 4.80881  |
| Si | 14.22856 | 9.98288  | 13.84998 |
| Si | 18.83313 | 2.67248  | 3.75742  |
| Si | 18.83009 | 15.49694 | 12.84355 |
| Si | 15.72874 | 17.27047 | 10.34669 |
| Si | 15.79898 | 4.39771  | 1.23065  |
| Si | 11.75751 | 8.56388  | 12.79627 |
| Si | 22.84296 | 14.94912 | 3.77664  |
| Si | 22.82897 | 11.41494 | 1.26266  |
| Si | 11.69886 | 4.97952  | 10.38853 |
| Si | 13.26377 | 14.09235 | 1.27742  |
| Si | 24.39208 | 7.66608  | 10.33282 |
| Si | 21.30650 | 5.86973  | 12.83552 |
| Si | 10.16981 | 12.31886 | 3.79193  |
| Si | 24.36114 | 12.30072 | 3.79359  |
| Si | 13.26807 | 5.87946  | 12.83739 |
| Si | 10.20431 | 7.65297  | 10.33900 |
| Si | 21.29659 | 14.05999 | 1.24510  |
| Si | 15.73310 | 15.50267 | 12.84338 |
| Si | 15.73670 | 2.65269  | 3.80468  |
| Si | 18.87897 | 4.41937  | 1.24103  |
| Si | 18.82599 | 17.25289 | 10.34552 |
| Si | 11.68775 | 11.47042 | 1.26294  |
| Si | 22.84639 | 4.99676  | 10.34223 |
| Si | 22.79957 | 8.56047  | 12.80184 |
| Si | 11.72403 | 14.95318 | 3.80405  |
| Si | 15.76133 | 7.29114  | 13.84999 |
| Si | 24.38218 | 9.43038  | 4.80147  |
| Si | 10.20525 | 7.62890  | 7.27346  |

|    |          |          |          |
|----|----------|----------|----------|
| Si | 18.82473 | 15.51430 | 2.25157  |
| Si | 14.20112 | 16.38595 | 4.80745  |
| Si | 20.36683 | 9.94458  | 13.85313 |
| Si | 11.74655 | 8.59254  | 2.26453  |
| Si | 22.83767 | 4.97543  | 7.29485  |
| Si | 21.31851 | 5.88609  | 2.26467  |
| Si | 18.83449 | 17.25804 | 7.30638  |
| Si | 13.30743 | 4.07214  | 4.89726  |
| Si | 15.74776 | 12.64292 | 13.86418 |
| Al | 13.16420 | 5.89138  | 2.34343  |
| O  | 19.15359 | 13.90323 | 12.88969 |
| O  | 19.75400 | 3.59070  | 4.73604  |
| O  | 15.40746 | 16.77999 | 8.82826  |
| O  | 14.96116 | 5.78031  | 1.75762  |
| O  | 10.47176 | 11.04295 | 4.75874  |
| O  | 19.76848 | 6.39113  | 12.87907 |
| O  | 14.80141 | 14.28108 | 1.78008  |
| O  | 24.08833 | 8.15247  | 8.81001  |
| O  | 22.25202 | 9.97624  | 1.76602  |
| O  | 12.24039 | 5.01966  | 8.86336  |
| O  | 21.63445 | 15.36198 | 4.78126  |
| O  | 13.00534 | 9.60347  | 12.84381 |
| O  | 24.07475 | 11.02846 | 4.76697  |
| O  | 14.79395 | 6.43667  | 12.85912 |
| O  | 10.51604 | 8.08753  | 8.80493  |
| O  | 19.75575 | 14.28796 | 1.71722  |
| O  | 15.42450 | 13.90494 | 12.88782 |
| O  | 14.82393 | 3.44361  | 4.87791  |
| O  | 19.77093 | 5.66387  | 1.78558  |
| O  | 19.14453 | 16.76383 | 8.82706  |
| O  | 12.26974 | 10.06528 | 1.80772  |
| O  | 22.26740 | 4.99509  | 8.81949  |
| O  | 21.55299 | 9.59525  | 12.76731 |
| O  | 12.96886 | 15.32243 | 4.78449  |
| O  | 10.49490 | 8.12428  | 1.31170  |
| O  | 5.02403  | 2.89521  | 4.36879  |
| O  | 6.76231  | 3.89126  | 7.15778  |
| O  | 12.33144 | 4.88642  | 1.22602  |
| O  | 8.63917  | 9.14385  | 4.36574  |
| O  | 10.35311 | 1.84430  | 1.28024  |
| O  | 6.91731  | 1.81751  | 1.28171  |
| O  | 8.65085  | 7.13780  | 7.16110  |
| O  | 6.76816  | 8.05453  | 1.29633  |
| O  | 10.50678 | 3.88199  | 7.16974  |

|   |          |          |          |
|---|----------|----------|----------|
| O | 12.24852 | 2.91777  | 4.40440  |
| O | 5.03328  | 5.06792  | 1.27241  |
| O | 19.05407 | 3.11327  | 2.19596  |
| O | 17.28071 | 15.78165 | 13.27265 |
| O | 17.27962 | 17.76503 | 10.46079 |
| O | 15.45121 | 3.22850  | 2.28197  |
| O | 12.23875 | 7.07613  | 13.25045 |
| O | 22.31013 | 14.86609 | 2.23777  |
| O | 24.03952 | 11.90394 | 2.24253  |
| O | 10.48693 | 6.06086  | 10.56973 |
| O | 12.24063 | 14.90395 | 2.25686  |
| O | 24.06618 | 6.07424  | 10.48189 |
| O | 22.32777 | 7.07120  | 13.26760 |
| O | 10.46510 | 11.97319 | 2.22396  |
| O | 17.29878 | 12.19296 | 13.77556 |
| O | 21.52963 | 5.33950  | 3.77538  |
| O | 17.27725 | 17.02100 | 6.92345  |
| O | 13.19835 | 5.34668  | 3.95246  |
| O | 11.16422 | 8.65061  | 3.78403  |
| O | 19.15016 | 8.86780  | 13.69713 |
| O | 15.37717 | 15.95615 | 3.78019  |
| O | 23.41576 | 6.42900  | 6.87193  |
| O | 23.40264 | 8.63736  | 3.78003  |
| O | 11.18062 | 6.40554  | 6.84285  |
| O | 19.22833 | 15.93376 | 3.76287  |
| O | 15.40419 | 8.87154  | 13.77942 |
| O | 27.84176 | 16.07515 | 3.89424  |
| O | 19.78318 | 16.33240 | 13.85646 |
| O | 32.05371 | 18.50791 | 10.76451 |
| O | 23.95257 | 9.04046  | 13.86166 |
| O | 27.87813 | 9.02513  | 13.82957 |
| O | 24.05116 | 16.03782 | 3.80519  |
| O | 32.05411 | 16.30514 | 13.86903 |
| O | 19.79054 | 18.48024 | 10.78399 |
| O | 21.71592 | 19.62930 | 13.88033 |
| O | 25.94146 | 7.92250  | 10.73139 |
| O | 30.17519 | 19.59716 | 13.85078 |
| O | 25.90545 | 12.77742 | 3.89828  |
| O | 19.80243 | 11.41603 | 13.45095 |
| O | 21.60110 | 4.58884  | 6.31575  |
| O | 14.78894 | 16.39579 | 6.31557  |
| O | 12.98197 | 7.58439  | 2.16339  |
| O | 10.46905 | 8.90620  | 6.31000  |
| O | 17.28027 | 7.04073  | 13.34789 |

|   |          |          |          |
|---|----------|----------|----------|
| O | 17.29146 | 14.98465 | 2.25008  |
| O | 24.10257 | 8.90834  | 6.30961  |
| O | 21.61053 | 7.47780  | 2.21817  |
| O | 13.00474 | 4.48845  | 6.44146  |
| O | 19.75718 | 16.37499 | 6.30832  |
| O | 14.81581 | 11.41124 | 13.37232 |
| O | 17.28908 | 2.90335  | 4.18271  |
| O | 19.09956 | 15.99275 | 11.32379 |
| O | 15.43689 | 16.01994 | 11.33555 |
| O | 17.32394 | 4.91302  | 1.26378  |
| O | 11.15832 | 8.56248  | 11.29038 |
| O | 23.40338 | 13.51468 | 4.27926  |
| O | 21.59260 | 12.46538 | 1.28079  |
| O | 12.95661 | 5.34372  | 11.34316 |
| O | 12.92603 | 12.51377 | 1.29599  |
| O | 23.46447 | 8.54547  | 11.32702 |
| O | 21.61633 | 5.38711  | 11.32069 |
| O | 11.11973 | 13.53449 | 4.29528  |
| H | 15.43823 | 6.62909  | 1.72753  |

187

structure 1

|    |           |           |           |
|----|-----------|-----------|-----------|
| Si | 18.851869 | 12.652841 | 13.888546 |
| Si | 21.298809 | 4.109059  | 4.799845  |
| Si | 15.726416 | 17.266258 | 7.306940  |
| Si | 10.189744 | 9.439963  | 4.806669  |
| Si | 18.804781 | 7.289522  | 13.839118 |
| Si | 15.759067 | 15.495698 | 2.274566  |
| Si | 24.393878 | 7.663002  | 7.295047  |
| Si | 22.839505 | 8.536935  | 2.261046  |
| Si | 11.739555 | 4.956313  | 7.323533  |
| Si | 20.380283 | 16.398755 | 4.812012  |
| Si | 14.234361 | 9.979428  | 13.844638 |
| Si | 18.829022 | 2.676285  | 3.755466  |
| Si | 18.835907 | 15.489319 | 12.839233 |
| Si | 15.731799 | 17.266910 | 10.346611 |
| Si | 15.788107 | 4.436866  | 1.240710  |
| Si | 11.762089 | 8.561477  | 12.794199 |
| Si | 22.844867 | 14.950922 | 3.778882  |
| Si | 22.831422 | 11.411991 | 1.262306  |
| Si | 11.700772 | 4.980480  | 10.387341 |
| Si | 13.263953 | 14.088079 | 1.281475  |
| Si | 24.387067 | 7.678522  | 10.336031 |
| Si | 21.309598 | 5.872048  | 12.835879 |

|    |           |           |           |
|----|-----------|-----------|-----------|
| Si | 10.170263 | 12.319841 | 3.797690  |
| Si | 24.356548 | 12.301568 | 3.797790  |
| Si | 13.269504 | 5.879243  | 12.836649 |
| Si | 10.203660 | 7.652506  | 10.340885 |
| Si | 21.294593 | 14.054508 | 1.245993  |
| Si | 15.733423 | 15.497213 | 12.839971 |
| Si | 15.733971 | 2.664203  | 3.798465  |
| Si | 18.874446 | 4.422326  | 1.238176  |
| Si | 18.830499 | 17.245818 | 10.346389 |
| Si | 11.692336 | 11.466566 | 1.265765  |
| Si | 22.843061 | 4.998290  | 10.338269 |
| Si | 22.797152 | 8.567568  | 12.811402 |
| Si | 11.721768 | 14.953956 | 3.808490  |
| Si | 15.763820 | 7.285025  | 13.844031 |
| Si | 24.379440 | 9.429398  | 4.801437  |
| Si | 10.209675 | 7.632941  | 7.274677  |
| Si | 18.821299 | 15.501939 | 2.256531  |
| Si | 14.202175 | 16.387016 | 4.811072  |
| Si | 20.362905 | 9.944059  | 13.868047 |
| Si | 11.734971 | 8.597208  | 2.264399  |
| Si | 22.828170 | 4.981805  | 7.294431  |
| Si | 21.316435 | 5.887627  | 2.260332  |
| Si | 18.836938 | 17.259823 | 7.305412  |
| Si | 13.309905 | 4.077492  | 4.899576  |
| Si | 15.745824 | 12.638951 | 13.854180 |
| Al | 13.194510 | 5.902955  | 2.341281  |
| O  | 19.160068 | 13.896404 | 12.876198 |
| O  | 19.753334 | 3.594345  | 4.732721  |
| O  | 15.422423 | 16.772520 | 8.827154  |
| O  | 14.974197 | 5.818743  | 1.765095  |
| O  | 10.475012 | 11.045075 | 4.762998  |
| O  | 19.773867 | 6.400718  | 12.877386 |
| O  | 14.798317 | 14.270024 | 1.794931  |
| O  | 24.093516 | 8.170678  | 8.812916  |
| O  | 22.255754 | 9.972228  | 1.763379  |
| O  | 12.249365 | 5.030753  | 8.864667  |
| O  | 21.636700 | 15.360808 | 4.785285  |
| O  | 13.016173 | 9.593217  | 12.836139 |
| O  | 24.066132 | 11.026391 | 4.765668  |
| O  | 14.792778 | 6.443011  | 12.847558 |
| O  | 10.520763 | 8.085359  | 8.807494  |
| O  | 19.753195 | 14.277866 | 1.718506  |
| O  | 15.420583 | 13.900697 | 12.879614 |
| O  | 14.824556 | 3.444439  | 4.882885  |

|   |           |           |           |
|---|-----------|-----------|-----------|
| O | 19.765568 | 5.668014  | 1.789980  |
| O | 19.136614 | 16.757884 | 8.825586  |
| O | 12.283851 | 10.064659 | 1.812987  |
| O | 22.259062 | 4.988414  | 8.818457  |
| O | 21.535918 | 9.583894  | 12.771283 |
| O | 12.970063 | 15.323858 | 4.784188  |
| O | 10.481295 | 8.155862  | 1.303273  |
| O | 5.025138  | 2.900371  | 4.383700  |
| O | 6.740240  | 3.884214  | 7.154385  |
| O | 12.339962 | 4.900396  | 1.234066  |
| O | 8.641038  | 9.147773  | 4.375981  |
| O | 10.339131 | 1.826860  | 1.279418  |
| O | 6.922771  | 1.800048  | 1.273560  |
| O | 8.651937  | 7.155825  | 7.156734  |
| O | 6.763282  | 8.044669  | 1.287208  |
| O | 10.517287 | 3.882800  | 7.172793  |
| O | 12.247925 | 2.919635  | 4.417632  |
| O | 5.029826  | 5.072436  | 1.264260  |
| O | 19.048470 | 3.113452  | 2.191299  |
| O | 17.283826 | 15.771285 | 13.263932 |
| O | 17.283801 | 17.752489 | 10.475188 |
| O | 15.455184 | 3.252882  | 2.284864  |
| O | 12.235169 | 7.071553  | 13.250186 |
| O | 22.308841 | 14.853112 | 2.242143  |
| O | 24.037485 | 11.905193 | 2.244918  |
| O | 10.488454 | 6.061122  | 10.572521 |
| O | 12.232885 | 14.889946 | 2.260024  |
| O | 24.054002 | 6.086435  | 10.473264 |
| O | 22.331338 | 7.071538  | 13.266710 |
| O | 10.475603 | 11.971366 | 2.231611  |
| O | 17.297597 | 12.194143 | 13.768338 |
| O | 21.529785 | 5.341589  | 3.770242  |
| O | 17.279289 | 17.033192 | 6.915179  |
| O | 13.196746 | 5.350259  | 3.952755  |
| O | 11.161178 | 8.656816  | 3.785113  |
| O | 19.142300 | 8.867770  | 13.722672 |
| O | 15.376266 | 15.960317 | 3.779525  |
| O | 23.417687 | 6.434494  | 6.888094  |
| O | 23.409219 | 8.629613  | 3.774914  |
| O | 11.177253 | 6.404659  | 6.840150  |
| O | 19.235768 | 15.932666 | 3.760859  |
| O | 15.412217 | 8.869139  | 13.786042 |
| O | 27.843886 | 16.079897 | 3.897659  |
| O | 19.780912 | 16.322666 | 13.862627 |

|   |           |           |           |
|---|-----------|-----------|-----------|
| O | 32.062134 | 18.511747 | 10.752552 |
| O | 23.940840 | 9.056634  | 13.874363 |
| O | 27.890304 | 9.039010  | 13.827491 |
| O | 24.043459 | 16.049789 | 3.786234  |
| O | 32.060505 | 16.299854 | 13.870558 |
| O | 19.789972 | 18.480163 | 10.776838 |
| O | 21.726119 | 19.637507 | 13.889397 |
| O | 25.940429 | 7.926358  | 10.728886 |
| O | 30.172791 | 19.600720 | 13.855272 |
| O | 25.903926 | 12.770660 | 3.903343  |
| O | 19.797700 | 11.415130 | 13.458605 |
| O | 21.588311 | 4.624776  | 6.308280  |
| O | 14.795489 | 16.382437 | 6.317482  |
| O | 12.963213 | 7.588600  | 2.167367  |
| O | 10.481356 | 8.912306  | 6.315211  |
| O | 17.280615 | 7.028535  | 13.339271 |
| O | 17.289185 | 14.965884 | 2.266752  |
| O | 24.091061 | 8.910823  | 6.308477  |
| O | 21.605632 | 7.480420  | 2.217478  |
| O | 13.015974 | 4.494126  | 6.446777  |
| O | 19.759744 | 16.373912 | 6.311431  |
| O | 14.817285 | 11.406977 | 13.358475 |
| O | 17.287017 | 2.906690  | 4.187003  |
| O | 19.121932 | 15.985219 | 11.321885 |
| O | 15.428514 | 16.020025 | 11.336303 |
| O | 17.325307 | 4.915471  | 1.260489  |
| O | 11.159710 | 8.561941  | 11.290221 |
| O | 23.411428 | 13.521381 | 4.293703  |
| O | 21.594065 | 12.460189 | 1.276317  |
| O | 12.958554 | 5.337054  | 11.345400 |
| O | 12.933811 | 12.507229 | 1.283388  |
| O | 23.460371 | 8.555585  | 11.333554 |
| O | 21.613600 | 5.377594  | 11.322282 |
| O | 11.116459 | 13.537175 | 4.304770  |
| H | 15.477686 | 6.689221  | 1.775276  |
| H | 15.102855 | 9.294257  | 1.351323  |
| H | 17.672446 | 7.781935  | 2.236521  |
| H | 17.055075 | 7.979790  | 0.497335  |
| H | 15.737963 | 9.090087  | 3.077970  |
| C | 15.864846 | 8.880704  | 2.013127  |
| C | 16.904124 | 8.164692  | 1.562649  |
| O | 19.124545 | 13.146045 | 15.417642 |
| O | 22.311639 | 2.900371  | 4.383700  |
| O | 15.383490 | 18.854763 | 7.154385  |

|   |           |           |           |
|---|-----------|-----------|-----------|
| O | 18.982381 | 6.817043  | 15.393787 |
| O | 15.566022 | 16.770597 | 1.273560  |
| O | 25.938438 | 7.155825  | 7.156734  |
| O | 24.049783 | 8.044669  | 1.287208  |
| O | 20.891176 | 17.890184 | 4.417632  |
| O | 13.673076 | 10.062619 | 15.378629 |
| O | 19.200635 | 1.109348  | 3.897659  |
| O | 14.775633 | 18.511747 | 10.752552 |
| O | 15.297589 | 4.066451  | -0.240006 |
| O | 10.603803 | 9.039010  | 13.827491 |
| O | 23.417255 | 11.309671 | -0.243811 |
| O | 11.146721 | 3.509614  | 10.776838 |
| O | 13.082868 | 14.647324 | -0.224972 |
| O | 21.529541 | 4.630171  | 13.855272 |
| O | 8.617425  | 12.770660 | 3.903343  |
| O | 13.082868 | 4.666959  | 13.889397 |
| O | 8.653928  | 7.926358  | 10.728886 |
| O | 21.529541 | 14.610537 | -0.259097 |
| O | 14.774004 | 16.299854 | 13.870558 |
| O | 15.400209 | 1.079240  | 3.786234  |
| O | 19.247053 | 4.048827  | -0.286878 |
| O | 11.137661 | 11.332483 | -0.251742 |
| O | 23.418883 | 3.541198  | 10.752552 |
| O | 10.557385 | 16.079897 | 3.897659  |
| O | 15.566022 | 6.790231  | 15.387929 |
| O | 25.927539 | 9.147773  | 4.375981  |
| O | 18.982381 | 16.797409 | 1.279418  |
| O | 13.668389 | 17.870920 | 4.383700  |
| O | 20.983213 | 9.890579  | 15.348435 |
| O | 24.026741 | 3.884214  | 7.154385  |
| O | 22.316327 | 5.072436  | 1.264260  |
| O | 19.160537 | 18.853349 | 7.172793  |
| O | 15.406533 | 13.034852 | 15.401577 |

157

structure 1'

|    |          |          |          |
|----|----------|----------|----------|
| Si | 18.73403 | 12.61237 | 13.83561 |
| Si | 21.22880 | 4.06074  | 4.75384  |
| Si | 15.65558 | 17.23728 | 7.25994  |
| Si | 10.09776 | 9.39805  | 4.75958  |
| Si | 18.70973 | 7.22660  | 13.77079 |
| Si | 15.67942 | 15.46018 | 2.23359  |
| Si | 24.29644 | 7.62271  | 7.24299  |
| Si | 22.75379 | 8.50468  | 2.21441  |



|    |          |          |          |
|----|----------|----------|----------|
| Si | 11.63569 | 4.93695  | 7.27873  |
| Si | 20.28983 | 16.37915 | 4.75473  |
| Si | 14.13327 | 9.94247  | 13.81093 |
| Si | 18.75279 | 2.62406  | 3.72326  |
| Si | 18.74471 | 15.45108 | 12.80162 |
| Si | 15.67434 | 17.24434 | 10.29840 |
| Si | 15.69269 | 4.35475  | 1.19183  |
| Si | 11.65826 | 8.50934  | 12.77029 |
| Si | 22.76503 | 14.91523 | 3.73544  |
| Si | 22.76518 | 11.39585 | 1.22427  |
| Si | 11.61628 | 4.95489  | 10.33649 |
| Si | 13.19030 | 14.03793 | 1.24557  |
| Si | 24.29259 | 7.64308  | 10.29168 |
| Si | 21.19646 | 5.80309  | 12.78389 |
| Si | 10.09030 | 12.28337 | 3.75184  |
| Si | 24.28723 | 12.27219 | 3.75915  |
| Si | 13.15611 | 5.84773  | 12.81681 |
| Si | 10.09890 | 7.61209  | 10.30329 |
| Si | 21.24454 | 14.03905 | 1.21195  |
| Si | 15.63713 | 15.47234 | 12.80297 |
| Si | 15.65745 | 2.62825  | 3.79264  |
| Si | 18.77811 | 4.38119  | 1.21072  |
| Si | 18.75603 | 17.21773 | 10.29300 |
| Si | 11.59589 | 11.42683 | 1.21035  |
| Si | 22.76989 | 4.96004  | 10.29944 |
| Si | 22.70181 | 8.52265  | 12.76542 |
| Si | 11.65485 | 14.91034 | 3.77154  |
| Si | 15.65893 | 7.26376  | 13.82906 |
| Si | 24.29369 | 9.39379  | 4.75803  |
| Si | 10.10237 | 7.60741  | 7.23352  |
| Si | 18.74216 | 15.50919 | 2.20949  |
| Si | 14.12648 | 16.35076 | 4.76780  |
| Si | 20.26123 | 9.89179  | 13.81123 |
| Si | 11.59478 | 8.53285  | 2.19573  |
| Si | 22.75751 | 4.93386  | 7.25077  |
| Si | 21.22396 | 5.85405  | 2.22831  |
| Si | 18.75503 | 17.23053 | 7.25826  |
| Si | 13.23274 | 4.05445  | 4.85402  |
| Si | 15.62229 | 12.61774 | 13.79815 |
| Al | 13.06041 | 5.82109  | 2.26571  |
| O  | 19.10741 | 13.86515 | 12.85381 |
| O  | 19.68745 | 3.54144  | 4.68754  |
| O  | 15.36091 | 16.74452 | 8.78202  |
| O  | 14.82420 | 5.72702  | 1.63961  |

|   |          |          |          |
|---|----------|----------|----------|
| O | 10.37667 | 11.00188 | 4.71102  |
| O | 19.63670 | 6.25426  | 12.84712 |
| O | 14.73002 | 14.22774 | 1.74487  |
| O | 24.00754 | 8.12338  | 8.76388  |
| O | 22.19364 | 9.94589  | 1.70411  |
| O | 12.16554 | 5.01471  | 8.81319  |
| O | 21.51278 | 15.30427 | 4.69450  |
| O | 12.93150 | 9.52066  | 12.79667 |
| O | 24.00198 | 10.99377 | 4.72383  |
| O | 14.67100 | 6.43272  | 12.84089 |
| O | 10.40229 | 8.05912  | 8.76960  |
| O | 19.71536 | 14.30172 | 1.70556  |
| O | 15.25779 | 13.88946 | 12.84829 |
| O | 14.75504 | 3.43503  | 4.86651  |
| O | 19.67115 | 5.62736  | 1.76494  |
| O | 19.05688 | 16.71737 | 8.77429  |
| O | 12.15234 | 9.99211  | 1.71111  |
| O | 22.19747 | 4.94141  | 8.77649  |
| O | 21.50601 | 9.61555  | 12.76873 |
| O | 12.89488 | 15.28769 | 4.75350  |
| O | 10.31236 | 8.09306  | 1.26810  |
| O | 4.95350  | 2.85828  | 4.31685  |
| O | 6.68910  | 3.85930  | 7.11045  |
| O | 12.15700 | 4.80513  | 1.20766  |
| O | 8.55162  | 9.09617  | 4.33600  |
| O | 10.25613 | 1.83361  | 1.22932  |
| O | 6.81379  | 1.78002  | 1.25822  |
| O | 8.55211  | 7.11308  | 7.09824  |
| O | 6.67739  | 7.99845  | 1.24613  |
| O | 10.41408 | 3.86030  | 7.14521  |
| O | 12.19499 | 2.88440  | 4.35719  |
| O | 4.92605  | 5.02966  | 1.22929  |
| O | 18.96638 | 3.06900  | 2.15945  |
| O | 17.19093 | 15.68030 | 13.24676 |
| O | 17.21963 | 17.75715 | 10.40484 |
| O | 15.37072 | 3.19790  | 2.27160  |
| O | 12.09590 | 7.01355  | 13.24711 |
| O | 22.28868 | 14.84093 | 2.17645  |
| O | 23.98155 | 11.87931 | 2.20336  |
| O | 10.38262 | 6.01563  | 10.51451 |
| O | 12.17870 | 14.86273 | 2.22696  |
| O | 23.98039 | 6.04857  | 10.44221 |
| O | 22.15779 | 7.05178  | 13.20255 |
| O | 10.38534 | 11.93462 | 2.18378  |

|   |          |          |          |
|---|----------|----------|----------|
| O | 17.17526 | 12.19451 | 13.64954 |
| O | 21.44398 | 5.31123  | 3.74056  |
| O | 17.20248 | 16.98590 | 6.85361  |
| O | 13.12610 | 5.31370  | 3.89029  |
| O | 11.07234 | 8.61711  | 3.73636  |
| O | 19.09222 | 8.78151  | 13.55480 |
| O | 15.30579 | 15.90553 | 3.74874  |
| O | 23.31889 | 6.39438  | 6.83633  |
| O | 23.31506 | 8.60502  | 3.73111  |
| O | 11.07493 | 6.38489  | 6.79671  |
| O | 19.10930 | 15.96132 | 3.72180  |
| O | 15.33245 | 8.85296  | 13.76599 |
| O | 27.76735 | 16.02682 | 3.86837  |
| O | 19.67772 | 16.32525 | 13.80447 |
| O | 32.00065 | 18.48001 | 10.71527 |
| O | 23.88428 | 8.91175  | 13.82738 |
| O | 27.79150 | 9.01431  | 13.79476 |
| O | 23.96028 | 16.01483 | 3.81591  |
| O | 31.98465 | 16.31938 | 13.82272 |
| O | 19.74526 | 18.43396 | 10.70900 |
| O | 21.63626 | 19.58625 | 13.85267 |
| O | 25.84020 | 7.91022  | 10.69726 |
| O | 30.12367 | 19.54322 | 13.80432 |
| O | 25.83013 | 12.75714 | 3.88071  |
| O | 19.66281 | 11.35573 | 13.42506 |
| O | 21.52345 | 4.54183  | 6.27256  |
| O | 14.69954 | 16.37060 | 6.28095  |
| O | 12.79955 | 7.50039  | 2.06485  |
| O | 10.37671 | 8.88777  | 6.27638  |
| O | 17.16936 | 6.99500  | 13.31694 |
| O | 17.21661 | 14.94678 | 2.18229  |
| O | 24.00075 | 8.88123  | 6.26715  |
| O | 21.51553 | 7.44895  | 2.17579  |
| O | 12.90382 | 4.47862  | 6.39075  |
| O | 19.69923 | 16.36537 | 6.26628  |
| O | 14.68338 | 11.38335 | 13.32432 |
| O | 17.21550 | 2.85891  | 4.17696  |
| O | 18.99806 | 15.95799 | 11.28233 |
| O | 15.39381 | 15.99050 | 11.28655 |
| O | 17.22341 | 4.85947  | 1.22823  |
| O | 11.06516 | 8.49825  | 11.26316 |
| O | 23.31877 | 13.47781 | 4.24358  |
| O | 21.52254 | 12.44001 | 1.27986  |
| O | 12.85598 | 5.34100  | 11.30891 |

|   |          |          |          |
|---|----------|----------|----------|
| O | 12.85447 | 12.45346 | 1.26699  |
| O | 23.33603 | 8.50596  | 11.27412 |
| O | 21.52554 | 5.33115  | 11.26871 |
| O | 11.06730 | 13.47955 | 4.25106  |
| C | 16.53555 | 8.13411  | 1.20866  |
| C | 15.54435 | 8.75066  | 1.86695  |
| C | 16.74172 | 7.59765  | 5.24438  |
| C | 17.27800 | 6.62304  | 4.50840  |
| H | 16.62608 | 8.19604  | 0.12242  |
| H | 17.30794 | 7.57297  | 1.73800  |
| H | 15.27050 | 6.62830  | 1.53914  |
| H | 15.46772 | 8.68708  | 2.95452  |
| H | 14.77507 | 9.33091  | 1.35737  |
| H | 17.18614 | 8.59388  | 5.28939  |
| H | 15.84373 | 7.43335  | 5.84309  |
| H | 16.84068 | 5.62344  | 4.48663  |
| H | 18.18259 | 6.77806  | 3.91757  |

187

structure 2

|    |           |           |           |
|----|-----------|-----------|-----------|
| Si | 18.871476 | 12.601672 | 13.811237 |
| Si | 21.300825 | 4.107880  | 4.800607  |
| Si | 15.724554 | 17.265540 | 7.302830  |
| Si | 10.174821 | 9.443912  | 4.821571  |
| Si | 18.810042 | 7.270043  | 13.822503 |
| Si | 15.759497 | 15.491865 | 2.273771  |
| Si | 24.394589 | 7.663268  | 7.298624  |
| Si | 22.829950 | 8.533963  | 2.262794  |
| Si | 11.750771 | 4.954391  | 7.320542  |
| Si | 20.375502 | 16.404436 | 4.807885  |
| Si | 14.233973 | 9.972563  | 13.847131 |
| Si | 18.826940 | 2.683401  | 3.763196  |
| Si | 18.817616 | 15.522230 | 12.836998 |
| Si | 15.727852 | 17.262182 | 10.340992 |
| Si | 15.769707 | 4.422917  | 1.233410  |
| Si | 11.749579 | 8.557692  | 12.811216 |
| Si | 22.842751 | 14.953946 | 3.802054  |
| Si | 22.821328 | 11.414966 | 1.271340  |
| Si | 11.701061 | 4.974753  | 10.382139 |
| Si | 13.266262 | 14.078923 | 1.283175  |
| Si | 24.375739 | 7.677382  | 10.340333 |
| Si | 21.309229 | 5.852099  | 12.836121 |
| Si | 10.160018 | 12.327121 | 3.815712  |
| Si | 24.336338 | 12.299108 | 3.811258  |

|    |           |           |           |
|----|-----------|-----------|-----------|
| Si | 13.263374 | 5.872942  | 12.842579 |
| Si | 10.194578 | 7.646282  | 10.351409 |
| Si | 21.299806 | 14.056368 | 1.261775  |
| Si | 15.707887 | 15.497885 | 12.833736 |
| Si | 15.753209 | 2.658824  | 3.763575  |
| Si | 18.846336 | 4.434225  | 1.245972  |
| Si | 18.827572 | 17.239430 | 10.335791 |
| Si | 11.645321 | 11.505085 | 1.242591  |
| Si | 22.834396 | 4.990535  | 10.341713 |
| Si | 22.853461 | 8.548295  | 12.830133 |
| Si | 11.721322 | 14.959546 | 3.806618  |
| Si | 15.760985 | 7.275451  | 13.842607 |
| Si | 24.361435 | 9.424844  | 4.804888  |
| Si | 10.212060 | 7.629655  | 7.283743  |
| Si | 18.822455 | 15.509369 | 2.253515  |
| Si | 14.204653 | 16.385718 | 4.810339  |
| Si | 20.323162 | 9.979134  | 13.806779 |
| Si | 11.678184 | 8.597222  | 2.253366  |
| Si | 22.828014 | 4.980125  | 7.298161  |
| Si | 21.313365 | 5.881615  | 2.256369  |
| Si | 18.834642 | 17.263895 | 7.300883  |
| Si | 13.289155 | 4.104254  | 4.863351  |
| Si | 15.732672 | 12.646352 | 13.852219 |
| Al | 13.245505 | 5.808887  | 2.288115  |
| O  | 19.199200 | 13.948284 | 12.962502 |
| O  | 19.760896 | 3.586414  | 4.746949  |
| O  | 15.420490 | 16.768272 | 8.822209  |
| O  | 14.851834 | 5.649180  | 1.693240  |
| O  | 10.499392 | 11.037314 | 4.755477  |
| O  | 19.765149 | 6.354928  | 12.876786 |
| O  | 14.798356 | 14.258406 | 1.800396  |
| O  | 24.109214 | 8.175132  | 8.813107  |
| O  | 22.252163 | 9.974717  | 1.776040  |
| O  | 12.263238 | 5.027669  | 8.861952  |
| O  | 21.621727 | 15.357856 | 4.794787  |
| O  | 13.009371 | 9.589289  | 12.844336 |
| O  | 24.038490 | 11.016626 | 4.765961  |
| O  | 14.790010 | 6.426645  | 12.851134 |
| O  | 10.513539 | 8.086536  | 8.815411  |
| O  | 19.757028 | 14.282565 | 1.729418  |
| O  | 15.397510 | 13.902115 | 12.872889 |
| O  | 14.815221 | 3.517192  | 4.775441  |
| O  | 19.776213 | 5.668152  | 1.770494  |
| O  | 19.129325 | 16.748714 | 8.817999  |

|   |           |           |           |
|---|-----------|-----------|-----------|
| O | 12.175362 | 10.037207 | 1.718653  |
| O | 22.256218 | 4.982150  | 8.820200  |
| O | 21.623327 | 9.608078  | 12.886068 |
| O | 12.976886 | 15.316201 | 4.775101  |
| O | 10.625485 | 7.881672  | 1.273407  |
| O | 5.033087  | 2.899892  | 4.389545  |
| O | 6.741165  | 3.883884  | 7.153993  |
| O | 12.046182 | 5.171715  | 1.242553  |
| O | 8.633645  | 9.159135  | 4.383165  |
| O | 10.346133 | 1.834041  | 1.272885  |
| O | 6.915019  | 1.793160  | 1.272516  |
| O | 8.655269  | 7.162130  | 7.144726  |
| O | 6.759026  | 8.056271  | 1.284897  |
| O | 10.521750 | 3.886337  | 7.183350  |
| O | 12.245821 | 2.920616  | 4.403173  |
| O | 5.053414  | 5.079430  | 1.271603  |
| O | 19.062801 | 3.132048  | 2.210634  |
| O | 17.263115 | 15.768637 | 13.249872 |
| O | 17.281491 | 17.741297 | 10.476200 |
| O | 15.564052 | 3.119585  | 2.211911  |
| O | 12.235367 | 7.065350  | 13.259762 |
| O | 22.317384 | 14.851489 | 2.258088  |
| O | 24.028846 | 11.915847 | 2.253540  |
| O | 10.485745 | 6.051883  | 10.560938 |
| O | 12.230591 | 14.873974 | 2.257886  |
| O | 24.038551 | 6.084121  | 10.475877 |
| O | 22.324012 | 7.058117  | 13.245135 |
| O | 10.452581 | 11.974202 | 2.245245  |
| O | 17.296637 | 12.243007 | 13.762881 |
| O | 21.534602 | 5.336142  | 3.767829  |
| O | 17.277996 | 17.040703 | 6.908566  |
| O | 13.072684 | 5.392843  | 3.943380  |
| O | 11.135705 | 8.652840  | 3.767626  |
| O | 19.170952 | 8.835111  | 13.644424 |
| O | 15.377827 | 15.957188 | 3.778055  |
| O | 23.419036 | 6.434922  | 6.898258  |
| O | 23.410057 | 8.615958  | 3.774623  |
| O | 11.183278 | 6.406506  | 6.846146  |
| O | 19.225347 | 15.941646 | 3.760105  |
| O | 15.410358 | 8.858630  | 13.778587 |
| O | 27.848919 | 16.082357 | 3.895132  |
| O | 19.729779 | 16.418962 | 13.842660 |
| O | 32.064432 | 18.506910 | 10.749637 |
| O | 24.066450 | 8.934226  | 13.829177 |

|   |           |           |           |
|---|-----------|-----------|-----------|
| O | 27.877287 | 9.024947  | 13.838232 |
| O | 24.039956 | 16.043912 | 3.862213  |
| O | 32.049881 | 16.301488 | 13.876533 |
| O | 19.794394 | 18.468117 | 10.764287 |
| O | 21.723381 | 19.619045 | 13.889079 |
| O | 25.930966 | 7.911937  | 10.740859 |
| O | 30.176725 | 19.591025 | 13.868161 |
| O | 25.890282 | 12.750231 | 3.936173  |
| O | 19.726979 | 11.380308 | 13.194188 |
| O | 21.592163 | 4.624537  | 6.309590  |
| O | 14.797622 | 16.373519 | 6.317046  |
| O | 13.093531 | 7.681894  | 2.305948  |
| O | 10.499890 | 8.907209  | 6.313572  |
| O | 17.278459 | 7.020814  | 13.342648 |
| O | 17.290977 | 14.965521 | 2.255334  |
| O | 24.082662 | 8.909936  | 6.311462  |
| O | 21.604271 | 7.477687  | 2.218857  |
| O | 13.017210 | 4.494770  | 6.427097  |
| O | 19.755048 | 16.381036 | 6.306458  |
| O | 14.830353 | 11.397354 | 13.357241 |
| O | 17.293237 | 2.891727  | 4.224814  |
| O | 19.109693 | 15.970024 | 11.308958 |
| O | 15.416614 | 16.012299 | 11.326593 |
| O | 17.315809 | 4.930563  | 1.282147  |
| O | 11.156118 | 8.546364  | 11.301008 |
| O | 23.394031 | 13.514082 | 4.313672  |
| O | 21.579359 | 12.456238 | 1.297123  |
| O | 12.947742 | 5.330718  | 11.353070 |
| O | 12.926472 | 12.489680 | 1.302849  |
| O | 23.421584 | 8.558647  | 11.305249 |
| O | 21.598118 | 5.341225  | 11.324684 |
| O | 11.112629 | 13.539875 | 4.307765  |
| H | 15.656776 | 7.876380  | 1.272827  |
| H | 13.931224 | 9.249535  | 3.426577  |
| H | 16.082180 | 9.339557  | 2.201293  |
| H | 14.749052 | 9.404827  | 1.027698  |
| H | 14.738287 | 7.668596  | 3.584646  |
| C | 14.306369 | 8.380831  | 2.871451  |
| C | 15.250824 | 8.766832  | 1.765027  |
| O | 19.268736 | 12.871855 | 15.387776 |
| O | 22.319588 | 2.899892  | 4.389545  |
| O | 15.384415 | 18.854433 | 7.153993  |
| O | 18.989383 | 6.824224  | 15.387254 |
| O | 15.558269 | 16.763709 | 1.272516  |

|   |           |           |           |
|---|-----------|-----------|-----------|
| O | 25.941770 | 7.162130  | 7.144726  |
| O | 24.045527 | 8.056271  | 1.284897  |
| O | 20.889072 | 17.891165 | 4.403173  |
| O | 13.696665 | 10.069613 | 15.385972 |
| O | 19.205669 | 1.111808  | 3.895132  |
| O | 14.777931 | 18.506910 | 10.749637 |
| O | 15.423199 | 3.944043  | -0.285192 |
| O | 10.590786 | 9.024947  | 13.838232 |
| O | 23.406631 | 11.311305 | -0.237836 |
| O | 11.151144 | 3.497568  | 10.764287 |
| O | 13.080130 | 14.628862 | -0.225290 |
| O | 21.533474 | 4.620476  | 13.868161 |
| O | 8.603781  | 12.750231 | 3.936173  |
| O | 13.080130 | 4.648496  | 13.889079 |
| O | 8.644466  | 7.911937  | 10.740859 |
| O | 21.533474 | 14.600842 | -0.246208 |
| O | 14.763380 | 16.301488 | 13.876533 |
| O | 15.396705 | 1.073363  | 3.862213  |
| O | 19.234037 | 4.034764  | -0.276136 |
| O | 11.086528 | 11.428779 | -0.271709 |
| O | 23.421181 | 3.536361  | 10.749637 |
| O | 10.562418 | 16.082357 | 3.895132  |
| O | 15.558269 | 6.783343  | 15.386885 |
| O | 25.920146 | 9.159135  | 4.383165  |
| O | 18.989383 | 16.804590 | 1.272885  |
| O | 13.676338 | 17.870441 | 4.389545  |
| O | 20.689432 | 10.161898 | 15.356921 |
| O | 24.027666 | 3.883884  | 7.153993  |
| O | 22.339915 | 5.079430  | 1.271603  |
| O | 19.165001 | 18.856886 | 7.183350  |
| O | 15.402277 | 13.046454 | 15.399266 |

157

structure 2'

|    |          |          |          |
|----|----------|----------|----------|
| Si | 18.77535 | 12.57393 | 13.75706 |
| Si | 21.23198 | 4.06478  | 4.75379  |
| Si | 15.65929 | 17.24457 | 7.26383  |
| Si | 10.09492 | 9.39069  | 4.76215  |
| Si | 18.72848 | 7.22961  | 13.75808 |
| Si | 15.68848 | 15.46993 | 2.23242  |
| Si | 24.30233 | 7.62414  | 7.24815  |
| Si | 22.74965 | 8.50871  | 2.21980  |
| Si | 11.66264 | 4.92879  | 7.27533  |
| Si | 20.28730 | 16.38531 | 4.75424  |



|    |          |          |          |
|----|----------|----------|----------|
| Si | 14.14058 | 9.94727  | 13.81360 |
| Si | 18.74774 | 2.63769  | 3.72799  |
| Si | 18.74667 | 15.48044 | 12.79839 |
| Si | 15.67526 | 17.25518 | 10.30436 |
| Si | 15.68626 | 4.33982  | 1.18009  |
| Si | 11.65603 | 8.51545  | 12.78666 |
| Si | 22.76457 | 14.92624 | 3.76157  |
| Si | 22.76631 | 11.40264 | 1.23486  |
| Si | 11.62158 | 4.95970  | 10.33501 |
| Si | 13.20560 | 14.04839 | 1.24559  |
| Si | 24.29077 | 7.65171  | 10.29865 |
| Si | 21.20613 | 5.80943  | 12.79055 |
| Si | 10.09444 | 12.28988 | 3.75372  |
| Si | 24.28459 | 12.27725 | 3.76960  |
| Si | 13.16218 | 5.85511  | 12.81929 |
| Si | 10.09785 | 7.61714  | 10.31204 |
| Si | 21.26008 | 14.05582 | 1.22381  |
| Si | 15.64142 | 15.47899 | 12.80787 |
| Si | 15.67814 | 2.63515  | 3.74425  |
| Si | 18.75343 | 4.40013  | 1.21917  |
| Si | 18.75437 | 17.22810 | 10.29034 |
| Si | 11.58633 | 11.47022 | 1.19241  |
| Si | 22.77256 | 4.97016  | 10.30074 |
| Si | 22.76694 | 8.51932  | 12.79821 |
| Si | 11.65826 | 14.92082 | 3.77646  |
| Si | 15.66823 | 7.26934  | 13.82674 |
| Si | 24.28987 | 9.39660  | 4.76326  |
| Si | 10.11223 | 7.59614  | 7.24074  |
| Si | 18.75077 | 15.52938 | 2.20509  |
| Si | 14.13005 | 16.35428 | 4.77218  |
| Si | 20.24308 | 9.94777  | 13.76525 |
| Si | 11.59829 | 8.55778  | 2.19193  |
| Si | 22.75764 | 4.94010  | 7.25329  |
| Si | 21.22875 | 5.85243  | 2.22970  |
| Si | 18.75918 | 17.23171 | 7.25674  |
| Si | 13.20992 | 4.10069  | 4.81254  |
| Si | 15.63113 | 12.62541 | 13.80929 |
| Al | 13.12253 | 5.75080  | 2.22426  |
| O  | 19.13711 | 13.90495 | 12.89293 |
| O  | 19.69324 | 3.54601  | 4.69404  |
| O  | 15.36862 | 16.75250 | 8.78767  |
| O  | 14.71325 | 5.53085  | 1.60760  |
| O  | 10.40391 | 10.98546 | 4.68119  |
| O  | 19.63478 | 6.22688  | 12.84904 |

|   |          |          |          |
|---|----------|----------|----------|
| O | 14.74648 | 14.23153 | 1.73584  |
| O | 24.02208 | 8.13149  | 8.76597  |
| O | 22.19368 | 9.95368  | 1.71504  |
| O | 12.18176 | 5.00755  | 8.81399  |
| O | 21.48781 | 15.28767 | 4.70042  |
| O | 12.93456 | 9.52571  | 12.80484 |
| O | 24.00178 | 10.99565 | 4.73125  |
| O | 14.68079 | 6.43248  | 12.84111 |
| O | 10.40296 | 8.06167  | 8.77313  |
| O | 19.72780 | 14.32046 | 1.71165  |
| O | 15.27952 | 13.89195 | 12.84748 |
| O | 14.75226 | 3.55776  | 4.71183  |
| O | 19.68655 | 5.62618  | 1.76286  |
| O | 19.04959 | 16.71849 | 8.77537  |
| O | 12.10678 | 10.00186 | 1.67599  |
| O | 22.19592 | 4.95317  | 8.77856  |
| O | 21.60537 | 9.65031  | 12.90622 |
| O | 12.89886 | 15.28853 | 4.76163  |
| O | 10.52083 | 7.86915  | 1.21776  |
| O | 4.95767  | 2.85895  | 4.32064  |
| O | 6.69203  | 3.86612  | 7.12133  |
| O | 11.88262 | 5.11318  | 1.22299  |
| O | 8.55275  | 9.09665  | 4.33643  |
| O | 10.26926 | 1.85476  | 1.22422  |
| O | 6.81802  | 1.78659  | 1.25642  |
| O | 8.55960  | 7.11687  | 7.09426  |
| O | 6.68136  | 8.01281  | 1.25387  |
| O | 10.43752 | 3.85538  | 7.14338  |
| O | 12.20274 | 2.88611  | 4.35709  |
| O | 4.95130  | 5.04378  | 1.23461  |
| O | 18.96391 | 3.08478  | 2.16941  |
| O | 17.19732 | 15.69316 | 13.25421 |
| O | 17.22049 | 17.76948 | 10.42121 |
| O | 15.51599 | 3.04226  | 2.17455  |
| O | 12.10787 | 7.01924  | 13.26071 |
| O | 22.30412 | 14.85198 | 2.19520  |
| O | 23.98622 | 11.88099 | 2.21346  |
| O | 10.38508 | 6.01759  | 10.50649 |
| O | 12.19120 | 14.85542 | 2.23398  |
| O | 23.98903 | 6.05207  | 10.43554 |
| O | 22.14852 | 7.06601  | 13.21316 |
| O | 10.38142 | 11.94677 | 2.17880  |
| O | 17.19634 | 12.22703 | 13.69172 |
| O | 21.46424 | 5.31216  | 3.74170  |

|   |          |          |          |
|---|----------|----------|----------|
| O | 17.20581 | 16.99859 | 6.85307  |
| O | 12.96110 | 5.38224  | 3.89230  |
| O | 11.06523 | 8.60122  | 3.71321  |
| O | 19.14823 | 8.76808  | 13.50062 |
| O | 15.30593 | 15.90552 | 3.74867  |
| O | 23.32140 | 6.40089  | 6.83573  |
| O | 23.31719 | 8.60815  | 3.73546  |
| O | 11.08935 | 6.37796  | 6.80691  |
| O | 19.09938 | 15.98515 | 3.72051  |
| O | 15.33898 | 8.85660  | 13.76102 |
| O | 27.77560 | 16.03632 | 3.86419  |
| O | 19.68503 | 16.37102 | 13.78632 |
| O | 31.99818 | 18.48714 | 10.71949 |
| O | 24.02754 | 8.82322  | 13.77214 |
| O | 27.79331 | 9.01930  | 13.80666 |
| O | 23.93906 | 16.03287 | 3.90754  |
| O | 31.99173 | 16.31536 | 13.83571 |
| O | 19.74887 | 18.43785 | 10.70871 |
| O | 21.64554 | 19.58417 | 13.85042 |
| O | 25.83987 | 7.91823  | 10.70737 |
| O | 30.13979 | 19.55089 | 13.81448 |
| O | 25.83444 | 12.74542 | 3.89565  |
| O | 19.62756 | 11.34186 | 13.16237 |
| O | 21.52734 | 4.54399  | 6.27452  |
| O | 14.70702 | 16.37304 | 6.28472  |
| O | 12.99756 | 7.62109  | 2.18698  |
| O | 10.40387 | 8.86627  | 6.26287  |
| O | 17.18145 | 7.01021  | 13.31871 |
| O | 17.22618 | 14.96152 | 2.17182  |
| O | 24.01116 | 8.88504  | 6.27190  |
| O | 21.52091 | 7.44969  | 2.17759  |
| O | 12.93154 | 4.48178  | 6.37686  |
| O | 19.69789 | 16.36376 | 6.26610  |
| O | 14.70881 | 11.38471 | 13.32390 |
| O | 17.21956 | 2.85241  | 4.21488  |
| O | 18.99736 | 15.96030 | 11.27405 |
| O | 15.39852 | 15.99804 | 11.29257 |
| O | 17.21903 | 4.89549  | 1.25002  |
| O | 11.07269 | 8.49152  | 11.27247 |
| O | 23.32141 | 13.48220 | 4.25687  |
| O | 21.53028 | 12.45268 | 1.28895  |
| O | 12.85694 | 5.34525  | 11.31282 |
| O | 12.86933 | 12.45576 | 1.27482  |
| O | 23.30605 | 8.50067  | 11.26289 |

|   |          |          |          |
|---|----------|----------|----------|
| O | 21.53175 | 5.33755  | 11.27412 |
| O | 11.07152 | 13.48253 | 4.25263  |
| C | 15.11169 | 8.74838  | 1.53140  |
| C | 14.26076 | 8.28890  | 2.68550  |
| C | 16.75629 | 7.67730  | 5.14586  |
| C | 17.09876 | 6.81041  | 4.19184  |
| H | 14.59959 | 9.50322  | 0.92330  |
| H | 16.02592 | 9.20069  | 1.94216  |
| H | 15.40505 | 7.89725  | 0.90577  |
| H | 14.76455 | 7.53357  | 3.29610  |
| H | 13.94182 | 9.10977  | 3.33979  |
| H | 17.16197 | 8.69046  | 5.17630  |
| H | 16.05450 | 7.40590  | 5.93695  |
| H | 16.68702 | 5.79998  | 4.17082  |
| H | 17.79322 | 7.06875  | 3.39034  |

157

structure 3

|    |          |          |          |
|----|----------|----------|----------|
| Si | 18.75794 | 12.61103 | 13.80999 |
| Si | 21.23520 | 4.06658  | 4.75195  |
| Si | 15.66475 | 17.24706 | 7.25788  |
| Si | 10.09878 | 9.40007  | 4.75514  |
| Si | 18.72027 | 7.23549  | 13.74853 |
| Si | 15.68929 | 15.46708 | 2.23136  |
| Si | 24.30248 | 7.63090  | 7.24570  |
| Si | 22.74732 | 8.51567  | 2.21914  |
| Si | 11.66470 | 4.93766  | 7.26782  |
| Si | 20.29581 | 16.39373 | 4.74960  |
| Si | 14.13999 | 9.95105  | 13.80484 |
| Si | 18.75422 | 2.63639  | 3.72127  |
| Si | 18.75674 | 15.46850 | 12.80093 |
| Si | 15.68184 | 17.25582 | 10.30105 |
| Si | 15.66693 | 4.37019  | 1.19870  |
| Si | 11.65338 | 8.52220  | 12.78117 |
| Si | 22.76871 | 14.92521 | 3.75585  |
| Si | 22.76704 | 11.40640 | 1.22766  |
| Si | 11.62961 | 4.96826  | 10.32632 |
| Si | 13.20270 | 14.04298 | 1.24447  |
| Si | 24.28888 | 7.65654  | 10.29525 |
| Si | 21.21539 | 5.82104  | 12.79091 |
| Si | 10.09393 | 12.29052 | 3.75118  |
| Si | 24.29125 | 12.28349 | 3.76232  |
| Si | 13.15822 | 5.85948  | 12.81751 |

|    |          |          |          |
|----|----------|----------|----------|
| Si | 10.10019 | 7.62296  | 10.30473 |
| Si | 21.25953 | 14.05846 | 1.21919  |
| Si | 15.65281 | 15.48485 | 12.80703 |
| Si | 15.68143 | 2.62982  | 3.74535  |
| Si | 18.75129 | 4.40445  | 1.22174  |
| Si | 18.76033 | 17.23094 | 10.28997 |
| Si | 11.60799 | 11.43232 | 1.21418  |
| Si | 22.77600 | 4.97145  | 10.29727 |
| Si | 22.75575 | 8.53329  | 12.80073 |
| Si | 11.66075 | 14.91664 | 3.77598  |
| Si | 15.66911 | 7.27026  | 13.82250 |
| Si | 24.29740 | 9.40285  | 4.75968  |
| Si | 10.10949 | 7.60660  | 7.23284  |
| Si | 18.75103 | 15.53261 | 2.20095  |
| Si | 14.12985 | 16.35191 | 4.77195  |
| Si | 20.24140 | 9.91741  | 13.80612 |
| Si | 11.63215 | 8.52347  | 2.19971  |
| Si | 22.76052 | 4.94392  | 7.24998  |
| Si | 21.22511 | 5.86091  | 2.22914  |
| Si | 18.76469 | 17.23495 | 7.25464  |
| Si | 13.23121 | 4.10082  | 4.81072  |
| Si | 15.63300 | 12.62632 | 13.80356 |
| Al | 13.09256 | 5.80793  | 2.20543  |
| O  | 19.10854 | 13.88321 | 12.84271 |
| O  | 19.68805 | 3.56349  | 4.68726  |
| O  | 15.37633 | 16.75669 | 8.78175  |
| O  | 14.74473 | 5.58140  | 1.66586  |
| O  | 10.37624 | 11.00646 | 4.71107  |
| O  | 19.64527 | 6.24403  | 12.84289 |
| O  | 14.74689 | 14.23056 | 1.73508  |
| O  | 24.01216 | 8.13654  | 8.76306  |
| O  | 22.18672 | 9.95872  | 1.71074  |
| O  | 12.19193 | 5.02476  | 8.80483  |
| O  | 21.49726 | 15.29616 | 4.69668  |
| O  | 12.93730 | 9.52477  | 12.79293 |
| O  | 24.01004 | 11.00349 | 4.72667  |
| O  | 14.67405 | 6.44491  | 12.83578 |
| O  | 10.41048 | 8.06399  | 8.76758  |
| O  | 19.72675 | 14.32047 | 1.70944  |
| O  | 15.28416 | 13.89931 | 12.84754 |
| O  | 14.77727 | 3.53776  | 4.75102  |
| O  | 19.66574 | 5.64062  | 1.79500  |
| O  | 19.05052 | 16.71826 | 8.77226  |
| O  | 12.16139 | 10.00296 | 1.72863  |

|   |          |          |          |
|---|----------|----------|----------|
| O | 22.19573 | 4.95042  | 8.77455  |
| O | 21.56331 | 9.63142  | 12.86982 |
| O | 12.89691 | 15.28964 | 4.76774  |
| O | 10.38257 | 8.05627  | 1.24566  |
| O | 4.95411  | 2.85824  | 4.32098  |
| O | 6.68939  | 3.86653  | 7.10560  |
| O | 11.95787 | 4.91266  | 1.24977  |
| O | 8.55242  | 9.09667  | 4.33647  |
| O | 10.25628 | 1.85137  | 1.21352  |
| O | 6.82992  | 1.78158  | 1.25117  |
| O | 8.55759  | 7.11697  | 7.09791  |
| O | 6.66326  | 8.00497  | 1.24907  |
| O | 10.44454 | 3.85896  | 7.14269  |
| O | 12.21666 | 2.89336  | 4.35858  |
| O | 4.92833  | 5.04966  | 1.22128  |
| O | 18.97039 | 3.08502  | 2.16317  |
| O | 17.20503 | 15.70624 | 13.25021 |
| O | 17.22520 | 17.77195 | 10.41491 |
| O | 15.51309 | 3.05811  | 2.18289  |
| O | 12.09805 | 7.02368  | 13.25047 |
| O | 22.30395 | 14.85217 | 2.19164  |
| O | 23.98305 | 11.88470 | 2.20840  |
| O | 10.39802 | 6.02788  | 10.50548 |
| O | 12.19830 | 14.86128 | 2.23659  |
| O | 23.99001 | 6.05545  | 10.41979 |
| O | 22.17102 | 7.06405  | 13.22010 |
| O | 10.39666 | 11.94633 | 2.18420  |
| O | 17.18716 | 12.21106 | 13.67549 |
| O | 21.46509 | 5.31640  | 3.74028  |
| O | 17.21112 | 17.00522 | 6.84501  |
| O | 13.04711 | 5.38710  | 3.89436  |
| O | 11.07404 | 8.62585  | 3.73167  |
| O | 19.10687 | 8.78024  | 13.48866 |
| O | 15.30566 | 15.90563 | 3.74831  |
| O | 23.31917 | 6.40686  | 6.83251  |
| O | 23.31248 | 8.61891  | 3.73487  |
| O | 11.08909 | 6.38638  | 6.79907  |
| O | 19.11124 | 15.99093 | 3.71330  |
| O | 15.33862 | 8.85915  | 13.76604 |
| O | 27.78205 | 16.04018 | 3.86221  |
| O | 19.69587 | 16.33557 | 13.80600 |
| O | 32.00114 | 18.48755 | 10.70863 |
| O | 24.00239 | 8.87043  | 13.78764 |
| O | 27.79756 | 9.03729  | 13.80947 |

|   |          |          |          |
|---|----------|----------|----------|
| O | 23.95088 | 16.02624 | 3.89648  |
| O | 31.99301 | 16.32029 | 13.82970 |
| O | 19.75121 | 18.44929 | 10.69301 |
| O | 21.64593 | 19.59435 | 13.85303 |
| O | 25.84092 | 7.91519  | 10.69561 |
| O | 30.13726 | 19.55789 | 13.81193 |
| O | 25.83527 | 12.76906 | 3.87669  |
| O | 19.65141 | 11.36054 | 13.31326 |
| O | 21.52219 | 4.55415  | 6.27224  |
| O | 14.71150 | 16.37137 | 6.28248  |
| O | 12.87481 | 7.53641  | 2.13117  |
| O | 10.38599 | 8.88664  | 6.27178  |
| O | 17.17534 | 6.99702  | 13.30197 |
| O | 17.22762 | 14.95647 | 2.18513  |
| O | 24.00569 | 8.88864  | 6.26777  |
| O | 21.50576 | 7.46175  | 2.19065  |
| O | 12.93725 | 4.48796  | 6.37452  |
| O | 19.70233 | 16.36740 | 6.26099  |
| O | 14.70061 | 11.38910 | 13.31647 |
| O | 17.22686 | 2.86226  | 4.20896  |
| O | 19.00820 | 15.97479 | 11.28047 |
| O | 15.40066 | 16.00199 | 11.29040 |
| O | 17.21822 | 4.90687  | 1.27382  |
| O | 11.06535 | 8.50531  | 11.26978 |
| O | 23.31958 | 13.48191 | 4.25490  |
| O | 21.52667 | 12.45372 | 1.28289  |
| O | 12.86440 | 5.34842  | 11.30795 |
| O | 12.87030 | 12.45725 | 1.27177  |
| O | 23.31666 | 8.50572  | 11.27033 |
| O | 21.53899 | 5.34431  | 11.27359 |
| O | 11.07150 | 13.48503 | 4.25595  |
| C | 15.84538 | 8.80434  | 2.29809  |
| C | 15.51720 | 7.95284  | 3.50947  |
| C | 16.56127 | 7.86581  | 4.96338  |
| C | 16.77932 | 6.94863  | 3.92341  |
| H | 14.94817 | 9.36892  | 2.01625  |
| H | 16.66538 | 9.50828  | 2.49112  |
| H | 16.11436 | 8.14883  | 1.46216  |
| H | 14.74867 | 7.17877  | 3.39430  |
| H | 15.00219 | 8.56550  | 4.29217  |
| H | 17.10517 | 8.80877  | 5.01887  |
| H | 15.96513 | 7.57856  | 5.83185  |
| H | 16.43515 | 5.92093  | 4.02509  |
| H | 17.57934 | 7.11938  | 3.20290  |

157

structure 4

|    |          |          |          |
|----|----------|----------|----------|
| Si | 18.75914 | 12.63014 | 13.85884 |
| Si | 21.23498 | 4.07296  | 4.76829  |
| Si | 15.65887 | 17.25245 | 7.28222  |
| Si | 10.06825 | 9.43977  | 4.80238  |
| Si | 18.73409 | 7.28082  | 13.83713 |
| Si | 15.67807 | 15.46367 | 2.25181  |
| Si | 24.29753 | 7.63992  | 7.26666  |
| Si | 22.75940 | 8.52445  | 2.21883  |
| Si | 11.63336 | 4.94867  | 7.29374  |
| Si | 20.29793 | 16.41556 | 4.77441  |
| Si | 14.15136 | 9.95269  | 13.81476 |
| Si | 18.75624 | 2.65334  | 3.73265  |
| Si | 18.75917 | 15.46130 | 12.82306 |
| Si | 15.67874 | 17.27219 | 10.33322 |
| Si | 15.70715 | 4.46868  | 1.21990  |
| Si | 11.69486 | 8.52335  | 12.77120 |
| Si | 22.77916 | 14.96712 | 3.74464  |
| Si | 22.75760 | 11.40743 | 1.24326  |
| Si | 11.63449 | 4.95727  | 10.35431 |
| Si | 13.18374 | 14.05291 | 1.26488  |
| Si | 24.30704 | 7.67909  | 10.31070 |
| Si | 21.24410 | 5.86312  | 12.81428 |
| Si | 10.07732 | 12.30958 | 3.78857  |
| Si | 24.26374 | 12.30265 | 3.80350  |
| Si | 13.20754 | 5.84532  | 12.81775 |
| Si | 10.11958 | 7.60785  | 10.32248 |
| Si | 21.22455 | 14.05194 | 1.22860  |
| Si | 15.64648 | 15.48190 | 12.82268 |
| Si | 15.65733 | 2.66883  | 3.77927  |
| Si | 18.81084 | 4.38195  | 1.21029  |
| Si | 18.76050 | 17.22937 | 10.32127 |
| Si | 11.58446 | 11.44476 | 1.24700  |
| Si | 22.76464 | 4.98402  | 10.32445 |
| Si | 22.72440 | 8.56665  | 12.77905 |
| Si | 11.64449 | 14.93457 | 3.79092  |
| Si | 15.68854 | 7.25625  | 13.82429 |
| Si | 24.26603 | 9.43646  | 4.78519  |
| Si | 10.10453 | 7.61157  | 7.25087  |
| Si | 18.73847 | 15.48721 | 2.24523  |
| Si | 14.12649 | 16.35672 | 4.79192  |
| Si | 20.29926 | 9.92139  | 13.84248 |



|    |          |          |          |
|----|----------|----------|----------|
| Si | 11.57356 | 8.56076  | 2.24937  |
| Si | 22.75525 | 4.94680  | 7.27420  |
| Si | 21.24852 | 5.85848  | 2.23306  |
| Si | 18.75424 | 17.24522 | 7.28185  |
| Si | 13.23080 | 4.06066  | 4.86755  |
| Si | 15.64451 | 12.63219 | 13.81309 |
| Al | 13.14036 | 5.87478  | 2.30210  |
| O  | 19.14520 | 13.88093 | 12.88078 |
| O  | 19.68753 | 3.56886  | 4.70357  |
| O  | 15.37531 | 16.77890 | 8.81255  |
| O  | 14.93892 | 5.89189  | 1.71189  |
| O  | 10.36718 | 11.04013 | 4.76254  |
| O  | 19.71311 | 6.40003  | 12.88069 |
| O  | 14.72266 | 14.23406 | 1.77095  |
| O  | 24.02067 | 8.16147  | 8.78388  |
| O  | 22.17759 | 9.95381  | 1.69894  |
| O  | 12.16780 | 5.03334  | 8.82613  |
| O  | 21.56979 | 15.39773 | 4.74125  |
| O  | 12.93535 | 9.57113  | 12.80126 |
| O  | 23.96023 | 11.03697 | 4.78309  |
| O  | 14.73921 | 6.38848  | 12.82842 |
| O  | 10.42896 | 8.03747  | 8.78681  |
| O  | 19.68726 | 14.27389 | 1.71454  |
| O  | 15.26877 | 13.89839 | 12.85879 |
| O  | 14.72794 | 3.38465  | 4.89449  |
| O  | 19.70182 | 5.62965  | 1.75666  |
| O  | 19.04195 | 16.72872 | 8.79949  |
| O  | 12.13537 | 10.01582 | 1.76382  |
| O  | 22.19370 | 4.94081  | 8.80054  |
| O  | 21.44543 | 9.56239  | 12.71955 |
| O  | 12.88862 | 15.30055 | 4.77360  |
| O  | 10.31919 | 8.09978  | 1.29606  |
| O  | 4.95201  | 2.86042  | 4.33749  |
| O  | 6.68741  | 3.87320  | 7.12660  |
| O  | 12.32444 | 4.85042  | 1.18788  |
| O  | 8.52410  | 9.15795  | 4.35674  |
| O  | 10.25892 | 1.81560  | 1.27632  |
| O  | 6.84197  | 1.76757  | 1.25110  |
| O  | 8.55241  | 7.12139  | 7.13025  |
| O  | 6.69361  | 8.02200  | 1.25965  |
| O  | 10.40647 | 3.87603  | 7.17988  |
| O  | 12.14145 | 2.94012  | 4.35319  |
| O  | 4.95918  | 5.03738  | 1.23846  |
| O  | 18.99479 | 3.07915  | 2.16924  |

|   |          |          |          |
|---|----------|----------|----------|
| O | 17.20245 | 15.68026 | 13.25842 |
| O | 17.22719 | 17.77415 | 10.46077 |
| O | 15.34507 | 3.31278  | 2.29303  |
| O | 12.19505 | 7.04945  | 13.24879 |
| O | 22.24184 | 14.86360 | 2.20986  |
| O | 23.94388 | 11.88668 | 2.25730  |
| O | 10.40516 | 6.01646  | 10.55473 |
| O | 12.16382 | 14.87148 | 2.24441  |
| O | 23.95486 | 6.09273  | 10.45918 |
| O | 22.28699 | 7.05639  | 13.21613 |
| O | 10.37696 | 11.95011 | 2.22445  |
| O | 17.20027 | 12.21557 | 13.66202 |
| O | 21.46388 | 5.31326  | 3.74546  |
| O | 17.20387 | 16.99778 | 6.87120  |
| O | 13.19831 | 5.33337  | 3.91573  |
| O | 11.02546 | 8.64682  | 3.77730  |
| O | 19.07027 | 8.85629  | 13.71935 |
| O | 15.29889 | 15.91501 | 3.76329  |
| O | 23.31295 | 6.41295  | 6.87013  |
| O | 23.30577 | 8.65360  | 3.73816  |
| O | 11.07422 | 6.39302  | 6.79599  |
| O | 19.13318 | 15.92363 | 3.75576  |
| O | 15.32227 | 8.83541  | 13.75067 |
| O | 27.75796 | 16.05353 | 3.88690  |
| O | 19.67405 | 16.33920 | 13.83891 |
| O | 32.00701 | 18.51044 | 10.75270 |
| O | 23.83998 | 9.06624  | 13.86481 |
| O | 27.81827 | 8.99287  | 13.80072 |
| O | 23.99845 | 16.04520 | 3.73563  |
| O | 32.01020 | 16.32610 | 13.85679 |
| O | 19.76372 | 18.43749 | 10.73001 |
| O | 21.65522 | 19.60023 | 13.86852 |
| O | 25.86218 | 7.90852  | 10.71120 |
| O | 30.10376 | 19.59293 | 13.83602 |
| O | 25.81374 | 12.76834 | 3.90559  |
| O | 19.71407 | 11.38895 | 13.45445 |
| O | 21.52563 | 4.55828  | 6.28709  |
| O | 14.70558 | 16.37837 | 6.30412  |
| O | 12.78469 | 7.53770  | 2.16045  |
| O | 10.35378 | 8.90997  | 6.31165  |
| O | 17.21227 | 7.02514  | 13.33497 |
| O | 17.21072 | 14.93536 | 2.22607  |
| O | 23.98941 | 8.88820  | 6.28279  |
| O | 21.53551 | 7.45333  | 2.17999  |

|   |          |          |          |
|---|----------|----------|----------|
| O | 12.89494 | 4.48143  | 6.40265  |
| O | 19.70834 | 16.39463 | 6.28639  |
| O | 14.72341 | 11.38676 | 13.33547 |
| O | 17.21470 | 2.91387  | 4.15591  |
| O | 19.01098 | 15.96492 | 11.30282 |
| O | 15.38553 | 16.01617 | 11.31522 |
| O | 17.26374 | 4.87440  | 1.22546  |
| O | 11.09035 | 8.50057  | 11.27035 |
| O | 23.32595 | 13.53647 | 4.27678  |
| O | 21.51986 | 12.45636 | 1.27217  |
| O | 12.88269 | 5.33507  | 11.31729 |
| O | 12.84256 | 12.47073 | 1.28199  |
| O | 23.39523 | 8.57986  | 11.30290 |
| O | 21.52327 | 5.35618  | 11.29842 |
| O | 11.04813 | 13.51234 | 4.28050  |
| C | 16.88590 | 10.24351 | 0.66581  |
| C | 15.54366 | 9.61978  | 1.04547  |
| C | 15.63795 | 7.21724  | 1.88523  |
| C | 15.39312 | 8.12169  | 0.68861  |
| H | 16.90420 | 11.31197 | 0.92285  |
| H | 17.73365 | 9.76568  | 1.17697  |
| H | 25.70118 | 15.15349 | 13.69733 |
| H | 14.73775 | 10.17566 | 0.54645  |
| H | 15.35494 | 9.75820  | 2.12280  |
| H | 16.69409 | 6.98855  | 2.06234  |
| H | 15.19343 | 7.63938  | 2.79410  |
| H | 14.36671 | 7.94095  | 0.34763  |
| H | 16.06573 | 7.84938  | -0.13925 |

187

structure TS1

|    |           |           |           |
|----|-----------|-----------|-----------|
| Si | 18.876452 | 12.620712 | 13.844379 |
| Si | 21.300483 | 4.109920  | 4.800390  |
| Si | 15.728011 | 17.268039 | 7.304520  |
| Si | 10.190111 | 9.438353  | 4.804817  |
| Si | 18.814684 | 7.277331  | 13.832666 |
| Si | 15.759577 | 15.492313 | 2.273195  |
| Si | 24.398196 | 7.661389  | 7.296928  |
| Si | 22.836177 | 8.537213  | 2.260886  |
| Si | 11.754777 | 4.957093  | 7.321514  |
| Si | 20.381586 | 16.410150 | 4.805808  |
| Si | 14.239319 | 9.976954  | 13.845891 |
| Si | 18.832494 | 2.682662  | 3.756500  |
| Si | 18.824971 | 15.500781 | 12.834216 |

|    |           |           |           |
|----|-----------|-----------|-----------|
| Si | 15.731370 | 17.264471 | 10.343910 |
| Si | 15.780047 | 4.453189  | 1.233538  |
| Si | 11.760137 | 8.559778  | 12.799855 |
| Si | 22.850852 | 14.957717 | 3.792406  |
| Si | 22.826010 | 11.415707 | 1.266940  |
| Si | 11.717618 | 4.976255  | 10.375395 |
| Si | 13.263753 | 14.086629 | 1.281455  |
| Si | 24.385782 | 7.674339  | 10.338547 |
| Si | 21.310780 | 5.856732  | 12.837093 |
| Si | 10.168728 | 12.319696 | 3.810783  |
| Si | 24.345787 | 12.301718 | 3.809040  |
| Si | 13.274156 | 5.878907  | 12.836115 |
| Si | 10.204768 | 7.649974  | 10.342434 |
| Si | 21.297752 | 14.052631 | 1.256862  |
| Si | 15.718931 | 15.497461 | 12.835445 |
| Si | 15.743014 | 2.673147  | 3.778527  |
| Si | 18.869850 | 4.427245  | 1.239772  |
| Si | 18.832199 | 17.245039 | 10.337970 |
| Si | 11.665515 | 11.484774 | 1.255016  |
| Si | 22.835334 | 4.990432  | 10.341617 |
| Si | 22.842365 | 8.551033  | 12.826482 |
| Si | 11.720805 | 14.958698 | 3.807442  |
| Si | 15.769557 | 7.281975  | 13.840373 |
| Si | 24.371674 | 9.428721  | 4.802789  |
| Si | 10.211564 | 7.632829  | 7.277809  |
| Si | 18.821032 | 15.503774 | 2.258675  |
| Si | 14.204460 | 16.387129 | 4.810944  |
| Si | 20.355240 | 9.966146  | 13.848255 |
| Si | 11.761832 | 8.580248  | 2.263681  |
| Si | 22.827652 | 4.979926  | 7.298531  |
| Si | 21.321811 | 5.885981  | 2.256998  |
| Si | 18.839276 | 17.266146 | 7.302225  |
| Si | 13.306764 | 4.098280  | 4.869457  |
| Si | 15.742897 | 12.644277 | 13.852071 |
| Al | 13.271069 | 5.909909  | 2.308400  |
| O  | 19.181325 | 13.917558 | 12.905374 |
| O  | 19.756791 | 3.594291  | 4.740952  |
| O  | 15.422389 | 16.772691 | 8.824199  |
| O  | 14.926835 | 5.764263  | 1.679261  |
| O  | 10.498558 | 11.038658 | 4.760796  |
| O  | 19.769353 | 6.366794  | 12.880219 |
| O  | 14.797145 | 14.261008 | 1.800209  |
| O  | 24.111721 | 8.174517  | 8.813009  |
| O  | 22.254295 | 9.975257  | 1.769436  |

|   |           |           |           |
|---|-----------|-----------|-----------|
| O | 12.284279 | 5.019794  | 8.858134  |
| O | 21.631853 | 15.364848 | 4.787327  |
| O | 13.015718 | 9.592687  | 12.843049 |
| O | 24.040289 | 11.020382 | 4.763727  |
| O | 14.798570 | 6.438496  | 12.844266 |
| O | 10.512171 | 8.096639  | 8.808546  |
| O | 19.756542 | 14.280287 | 1.728193  |
| O | 15.405144 | 13.902093 | 12.875788 |
| O | 14.823599 | 3.475081  | 4.843823  |
| O | 19.780167 | 5.671717  | 1.772145  |
| O | 19.132621 | 16.750132 | 8.819319  |
| O | 12.247735 | 10.058203 | 1.768435  |
| O | 22.254772 | 4.978361  | 8.820590  |
| O | 21.599108 | 9.590768  | 12.846834 |
| O | 12.974911 | 15.319627 | 4.778636  |
| O | 10.604209 | 7.997946  | 1.280112  |
| O | 5.028926  | 2.900374  | 4.387760  |
| O | 6.740994  | 3.885055  | 7.153487  |
| O | 12.187505 | 5.074803  | 1.258962  |
| O | 8.639071  | 9.164117  | 4.380354  |
| O | 10.337805 | 1.824642  | 1.277863  |
| O | 6.920975  | 1.791930  | 1.268324  |
| O | 8.656017  | 7.153448  | 7.147870  |
| O | 6.759384  | 8.050929  | 1.283887  |
| O | 10.526366 | 3.888352  | 7.188949  |
| O | 12.247600 | 2.928494  | 4.402602  |
| O | 5.053976  | 5.080399  | 1.270314  |
| O | 19.079428 | 3.125176  | 2.200736  |
| O | 17.272030 | 15.766940 | 13.252975 |
| O | 17.284716 | 17.746006 | 10.475347 |
| O | 15.494777 | 3.215679  | 2.255675  |
| O | 12.241988 | 7.069639  | 13.251273 |
| O | 22.317414 | 14.841336 | 2.254381  |
| O | 24.027108 | 11.917742 | 2.253306  |
| O | 10.506579 | 6.058446  | 10.550020 |
| O | 12.229918 | 14.883404 | 2.257721  |
| O | 24.040462 | 6.083314  | 10.474428 |
| O | 22.331832 | 7.058376  | 13.250059 |
| O | 10.464611 | 11.968988 | 2.242378  |
| O | 17.303323 | 12.232144 | 13.770470 |
| O | 21.533735 | 5.340166  | 3.768517  |
| O | 17.281751 | 17.046064 | 6.910628  |
| O | 13.171739 | 5.378904  | 3.934867  |
| O | 11.155035 | 8.654706  | 3.766849  |

|   |           |           |           |
|---|-----------|-----------|-----------|
| O | 19.179495 | 8.842782  | 13.697453 |
| O | 15.376309 | 15.959694 | 3.776659  |
| O | 23.417764 | 6.434588  | 6.898874  |
| O | 23.414013 | 8.623021  | 3.772248  |
| O | 11.185773 | 6.408358  | 6.853571  |
| O | 19.230195 | 15.936638 | 3.763373  |
| O | 15.416200 | 8.864929  | 13.781617 |
| O | 27.846256 | 16.082818 | 3.897857  |
| O | 19.746603 | 16.361603 | 13.858170 |
| O | 32.064132 | 18.507278 | 10.754297 |
| O | 24.034024 | 8.977205  | 13.846234 |
| O | 27.887860 | 9.028123  | 13.830397 |
| O | 24.044905 | 16.056058 | 3.816859  |
| O | 32.056683 | 16.303951 | 13.873658 |
| O | 19.797774 | 18.476898 | 10.761770 |
| O | 21.733227 | 19.632492 | 13.888183 |
| O | 25.940810 | 7.906414  | 10.739772 |
| O | 30.177877 | 19.592878 | 13.865524 |
| O | 25.899553 | 12.748987 | 3.923769  |
| O | 19.760230 | 11.386104 | 13.297570 |
| O | 21.590957 | 4.623866  | 6.309832  |
| O | 14.800033 | 16.377849 | 6.316887  |
| O | 13.106962 | 7.673281  | 2.255862  |
| O | 10.494265 | 8.904673  | 6.306189  |
| O | 17.286601 | 7.032644  | 13.335739 |
| O | 17.289345 | 14.959740 | 2.262233  |
| O | 24.088830 | 8.907273  | 6.308425  |
| O | 21.604740 | 7.481741  | 2.217847  |
| O | 13.016668 | 4.503011  | 6.423595  |
| O | 19.758400 | 16.384274 | 6.304463  |
| O | 14.827658 | 11.402598 | 13.355073 |
| O | 17.293951 | 2.905063  | 4.194335  |
| O | 19.123719 | 15.985110 | 11.317277 |
| O | 15.422498 | 16.014022 | 11.328775 |
| O | 17.333623 | 4.925931  | 1.274431  |
| O | 11.164072 | 8.556013  | 11.291748 |
| O | 23.417874 | 13.528495 | 4.314122  |
| O | 21.579929 | 12.453276 | 1.285892  |
| O | 12.964444 | 5.336004  | 11.345410 |
| O | 12.928528 | 12.500281 | 1.289698  |
| O | 23.449072 | 8.556329  | 11.319221 |
| O | 21.600271 | 5.347458  | 11.325121 |
| O | 11.115493 | 13.539514 | 4.305291  |
| H | 15.510434 | 7.117798  | 1.569137  |

|   |           |           |           |
|---|-----------|-----------|-----------|
| H | 14.362149 | 9.648286  | 2.251572  |
| H | 16.898133 | 7.949344  | 2.111356  |
| H | 16.022878 | 8.694081  | 0.659523  |
| H | 15.017526 | 8.544701  | 3.590325  |
| C | 15.007142 | 8.818419  | 2.533401  |
| C | 15.945164 | 8.258349  | 1.658170  |
| O | 19.247459 | 12.988129 | 15.394481 |
| O | 22.315426 | 2.900374  | 4.387760  |
| O | 15.384244 | 18.855604 | 7.153487  |
| O | 18.981055 | 6.814825  | 15.392232 |
| O | 15.564225 | 16.762479 | 1.268324  |
| O | 25.942518 | 7.153448  | 7.147870  |
| O | 24.045885 | 8.050929  | 1.283887  |
| O | 20.890850 | 17.899043 | 4.402602  |
| O | 13.697227 | 10.070582 | 15.384682 |
| O | 19.203005 | 1.112269  | 3.897857  |
| O | 14.777632 | 18.507278 | 10.754297 |
| O | 15.390773 | 3.987022  | -0.268135 |
| O | 10.601359 | 9.028123  | 13.830397 |
| O | 23.413432 | 11.313768 | -0.240711 |
| O | 11.154523 | 3.506349  | 10.761770 |
| O | 13.089976 | 14.642309 | -0.226186 |
| O | 21.534627 | 4.622329  | 13.865524 |
| O | 8.613053  | 12.748987 | 3.923769  |
| O | 13.089976 | 4.661943  | 13.888183 |
| O | 8.654309  | 7.906414  | 10.739772 |
| O | 21.534627 | 14.602695 | -0.248844 |
| O | 14.770182 | 16.303951 | 13.873658 |
| O | 15.401654 | 1.085509  | 3.816859  |
| O | 19.244610 | 4.037940  | -0.283972 |
| O | 11.103353 | 11.371420 | -0.256199 |
| O | 23.420882 | 3.536729  | 10.754297 |
| O | 10.559755 | 16.082818 | 3.897857  |
| O | 15.564225 | 6.782113  | 15.382693 |
| O | 25.925572 | 9.164117  | 4.380354  |
| O | 18.981055 | 16.795191 | 1.277863  |
| O | 13.672176 | 17.870923 | 4.387760  |
| O | 20.830755 | 10.064986 | 15.373331 |
| O | 24.027495 | 3.885055  | 7.153487  |
| O | 22.340477 | 5.080399  | 1.270314  |
| O | 19.169616 | 18.858901 | 7.188949  |
| O | 15.402635 | 13.041112 | 15.398256 |

## structure TS2

|    |          |          |          |
|----|----------|----------|----------|
| Si | 18.77327 | 12.59417 | 13.79058 |
| Si | 21.23185 | 4.06288  | 4.75566  |
| Si | 15.65805 | 17.23938 | 7.26120  |
| Si | 10.09861 | 9.39781  | 4.75639  |
| Si | 18.72265 | 7.22543  | 13.75070 |
| Si | 15.68659 | 15.46394 | 2.23288  |
| Si | 24.30330 | 7.62503  | 7.24785  |
| Si | 22.74466 | 8.51064  | 2.22242  |
| Si | 11.66284 | 4.92661  | 7.26613  |
| Si | 20.28582 | 16.37980 | 4.75142  |
| Si | 14.13988 | 9.95045  | 13.81474 |
| Si | 18.74939 | 2.63298  | 3.73169  |
| Si | 18.74958 | 15.47263 | 12.80059 |
| Si | 15.67673 | 17.25018 | 10.29897 |
| Si | 15.67184 | 4.33886  | 1.19404  |
| Si | 11.65262 | 8.51918  | 12.78480 |
| Si | 22.76357 | 14.91578 | 3.75616  |
| Si | 22.76342 | 11.40084 | 1.22897  |
| Si | 11.62723 | 4.96438  | 10.32583 |
| Si | 13.19747 | 14.04752 | 1.24119  |
| Si | 24.29184 | 7.65256  | 10.29813 |
| Si | 21.20650 | 5.80960  | 12.78945 |
| Si | 10.09054 | 12.28310 | 3.75151  |
| Si | 24.28731 | 12.27598 | 3.76180  |
| Si | 13.15942 | 5.85512  | 12.81263 |
| Si | 10.10359 | 7.62444  | 10.30573 |
| Si | 21.25716 | 14.05245 | 1.21970  |
| Si | 15.64752 | 15.47988 | 12.80673 |
| Si | 15.67720 | 2.61649  | 3.75077  |
| Si | 18.75061 | 4.39563  | 1.22437  |
| Si | 18.75769 | 17.22935 | 10.28816 |
| Si | 11.60564 | 11.43448 | 1.20934  |
| Si | 22.77517 | 4.96930  | 10.29976 |
| Si | 22.75782 | 8.52519  | 12.79764 |
| Si | 11.65791 | 14.91628 | 3.76735  |
| Si | 15.66663 | 7.26655  | 13.82584 |
| Si | 24.29536 | 9.39666  | 4.76206  |
| Si | 10.11255 | 7.59948  | 7.23483  |
| Si | 18.74632 | 15.52719 | 2.20188  |
| Si | 14.12805 | 16.34988 | 4.76979  |
| Si | 20.23827 | 9.92963  | 13.77494 |
| Si | 11.66683 | 8.53103  | 2.20433  |
| Si | 22.76045 | 4.93907  | 7.25241  |



|    |          |          |          |
|----|----------|----------|----------|
| Si | 21.22475 | 5.85752  | 2.23341  |
| Si | 18.76112 | 17.22543 | 7.25438  |
| Si | 13.21774 | 4.08408  | 4.81119  |
| Si | 15.63638 | 12.62255 | 13.80925 |
| Al | 13.09132 | 5.79337  | 2.21316  |
| O  | 19.10716 | 13.88930 | 12.85354 |
| O  | 19.68767 | 3.55186  | 4.69862  |
| O  | 15.36428 | 16.74511 | 8.78315  |
| O  | 14.72071 | 5.53536  | 1.64231  |
| O  | 10.37759 | 11.00294 | 4.71547  |
| O  | 19.63279 | 6.21904  | 12.84779 |
| O  | 14.73865 | 14.22875 | 1.74144  |
| O  | 24.01650 | 8.13084  | 8.76566  |
| O  | 22.18647 | 9.95372  | 1.71284  |
| O  | 12.18556 | 5.00785  | 8.80406  |
| O  | 21.48979 | 15.28595 | 4.69488  |
| O  | 12.92879 | 9.53132  | 12.81022 |
| O  | 24.00695 | 10.99605 | 4.72615  |
| O  | 14.67648 | 6.43479  | 12.84022 |
| O  | 10.41174 | 8.06512  | 8.76739  |
| O  | 19.72580 | 14.31882 | 1.70957  |
| O  | 15.29267 | 13.89114 | 12.84565 |
| O  | 14.75861 | 3.51660  | 4.74723  |
| O  | 19.67389 | 5.63009  | 1.77959  |
| O  | 19.05529 | 16.71687 | 8.77336  |
| O  | 12.18168 | 10.00032 | 1.70500  |
| O  | 22.19730 | 4.95182  | 8.77699  |
| O  | 21.58691 | 9.64573  | 12.88186 |
| O  | 12.90201 | 15.27889 | 4.75234  |
| O  | 10.47967 | 7.98073  | 1.23010  |
| O  | 4.95347  | 2.85691  | 4.32098  |
| O  | 6.68876  | 3.86040  | 7.11109  |
| O  | 11.91192 | 5.00677  | 1.22732  |
| O  | 8.55291  | 9.09635  | 4.33653  |
| O  | 10.25817 | 1.85024  | 1.21848  |
| O  | 6.82552  | 1.77939  | 1.25472  |
| O  | 8.55985  | 7.11444  | 7.09818  |
| O  | 6.66349  | 8.00543  | 1.25073  |
| O  | 10.44387 | 3.84739  | 7.13070  |
| O  | 12.19774 | 2.88121  | 4.35719  |
| O  | 4.94631  | 5.05403  | 1.23594  |
| O  | 18.97010 | 3.08258  | 2.17461  |
| O  | 17.19943 | 15.70895 | 13.25257 |
| O  | 17.22121 | 17.76688 | 10.40536 |

|   |          |          |          |
|---|----------|----------|----------|
| O | 15.51040 | 3.03795  | 2.18589  |
| O | 12.10123 | 7.01953  | 13.24805 |
| O | 22.30257 | 14.84508 | 2.19072  |
| O | 23.98236 | 11.88040 | 2.20609  |
| O | 10.39917 | 6.02850  | 10.50529 |
| O | 12.18495 | 14.86709 | 2.22330  |
| O | 23.98920 | 6.05295  | 10.43593 |
| O | 22.14859 | 7.06610  | 13.21086 |
| O | 10.38992 | 11.91418 | 2.18763  |
| O | 17.19573 | 12.21561 | 13.70808 |
| O | 21.45940 | 5.31301  | 3.74480  |
| O | 17.20570 | 16.99254 | 6.85502  |
| O | 13.01295 | 5.36091  | 3.88738  |
| O | 11.07772 | 8.63704  | 3.71784  |
| O | 19.13271 | 8.76185  | 13.47782 |
| O | 15.30604 | 15.90580 | 3.74851  |
| O | 23.32126 | 6.40049  | 6.83552  |
| O | 23.31409 | 8.61082  | 3.73723  |
| O | 11.08816 | 6.37711  | 6.80333  |
| O | 19.09836 | 15.98029 | 3.71728  |
| O | 15.33310 | 8.85330  | 13.76559 |
| O | 27.77724 | 16.03503 | 3.86788  |
| O | 19.69418 | 16.33682 | 13.80320 |
| O | 32.00137 | 18.48536 | 10.70888 |
| O | 24.00929 | 8.83678  | 13.78392 |
| O | 27.79127 | 9.02149  | 13.81157 |
| O | 23.94966 | 16.01092 | 3.89671  |
| O | 31.98360 | 16.31050 | 13.82836 |
| O | 19.74566 | 18.44712 | 10.69768 |
| O | 21.64632 | 19.58689 | 13.84577 |
| O | 25.84333 | 7.91573  | 10.69674 |
| O | 30.13924 | 19.55015 | 13.81231 |
| O | 25.83246 | 12.75992 | 3.87719  |
| O | 19.63116 | 11.34714 | 13.22678 |
| O | 21.52562 | 4.54632  | 6.27495  |
| O | 14.70486 | 16.36720 | 6.28224  |
| O | 12.96147 | 7.56758  | 2.18475  |
| O | 10.39714 | 8.87207  | 6.26412  |
| O | 17.17550 | 7.00117  | 13.30963 |
| O | 17.22324 | 14.94913 | 2.17815  |
| O | 24.00925 | 8.88476  | 6.27130  |
| O | 21.50413 | 7.45807  | 2.19490  |
| O | 12.93554 | 4.48101  | 6.37341  |
| O | 19.69652 | 16.35250 | 6.26379  |

|   |          |          |          |
|---|----------|----------|----------|
| O | 14.70750 | 11.38463 | 13.32114 |
| O | 17.22056 | 2.85392  | 4.21633  |
| O | 19.00540 | 15.97349 | 11.28101 |
| O | 15.39769 | 15.99679 | 11.29034 |
| O | 17.21456 | 4.89195  | 1.26980  |
| O | 11.07064 | 8.50634  | 11.27041 |
| O | 23.31610 | 13.47297 | 4.25415  |
| O | 21.52384 | 12.44822 | 1.28516  |
| O | 12.86538 | 5.34640  | 11.30280 |
| O | 12.86296 | 12.46030 | 1.27300  |
| O | 23.31708 | 8.50505  | 11.26841 |
| O | 21.53412 | 5.33615  | 11.27316 |
| O | 11.07149 | 13.47960 | 4.23761  |
| C | 15.54613 | 8.77936  | 2.04088  |
| C | 14.96121 | 8.03658  | 3.17162  |
| C | 16.61632 | 8.01059  | 4.94740  |
| C | 17.00769 | 7.02049  | 4.11535  |
| H | 14.75420 | 9.41143  | 1.60790  |
| H | 16.32868 | 9.47785  | 2.37098  |
| H | 15.93798 | 8.10107  | 1.27648  |
| H | 14.93051 | 6.95703  | 3.18366  |
| H | 14.45388 | 8.55195  | 3.98818  |
| H | 16.99239 | 9.02935  | 4.84634  |
| H | 15.97012 | 7.80228  | 5.80180  |
| H | 16.67087 | 5.99239  | 4.26552  |
| H | 17.69030 | 7.19061  | 3.28127  |

157

structure TS3

|    |          |          |          |
|----|----------|----------|----------|
| Si | 18.82710 | 12.61023 | 13.92874 |
| Si | 21.26181 | 4.07702  | 4.81542  |
| Si | 15.68071 | 17.24672 | 7.32732  |
| Si | 10.10510 | 9.41707  | 4.86481  |
| Si | 18.77557 | 7.28239  | 13.85337 |
| Si | 15.71570 | 15.46240 | 2.28959  |
| Si | 24.31017 | 7.63983  | 7.33017  |
| Si | 22.79625 | 8.50369  | 2.27385  |
| Si | 11.65760 | 4.94531  | 7.33448  |
| Si | 20.34184 | 16.41961 | 4.81203  |
| Si | 14.18299 | 9.94885  | 13.84729 |
| Si | 18.78077 | 2.64202  | 3.78100  |
| Si | 18.80979 | 15.46684 | 12.87922 |
| Si | 15.70895 | 17.23887 | 10.37767 |
| Si | 15.72517 | 4.47249  | 1.27267  |

|    |          |          |          |
|----|----------|----------|----------|
| Si | 11.72917 | 8.51396  | 12.81916 |
| Si | 22.80860 | 14.95317 | 3.79869  |
| Si | 22.80024 | 11.39276 | 1.28781  |
| Si | 11.66844 | 4.94422  | 10.40095 |
| Si | 13.20956 | 14.04964 | 1.31240  |
| Si | 24.33832 | 7.64505  | 10.37180 |
| Si | 21.27411 | 5.84704  | 12.86493 |
| Si | 10.10711 | 12.29937 | 3.84356  |
| Si | 24.29009 | 12.28433 | 3.84511  |
| Si | 13.24472 | 5.82391  | 12.85980 |
| Si | 10.14587 | 7.59009  | 10.38379 |
| Si | 21.25539 | 14.03081 | 1.27661  |
| Si | 15.69949 | 15.46755 | 12.86593 |
| Si | 15.68935 | 2.66269  | 3.81605  |
| Si | 18.83093 | 4.36848  | 1.26117  |
| Si | 18.81060 | 17.19744 | 10.36497 |
| Si | 11.60134 | 11.45545 | 1.31225  |
| Si | 22.80937 | 4.95807  | 10.37257 |
| Si | 22.78366 | 8.53041  | 12.86526 |
| Si | 11.66453 | 14.92822 | 3.83864  |
| Si | 15.73016 | 7.24553  | 13.85690 |
| Si | 24.28883 | 9.41209  | 4.84083  |
| Si | 10.11646 | 7.60317  | 7.30589  |
| Si | 18.77589 | 15.48064 | 2.27881  |
| Si | 14.15329 | 16.36198 | 4.83267  |
| Si | 20.34964 | 9.93810  | 13.91644 |
| Si | 11.64659 | 8.53902  | 2.34286  |
| Si | 22.77391 | 4.93981  | 7.32606  |
| Si | 21.27414 | 5.85384  | 2.27183  |
| Si | 18.78725 | 17.23347 | 7.33103  |
| Si | 13.27381 | 4.08204  | 4.89788  |
| Si | 15.71022 | 12.60810 | 13.87050 |
| Al | 13.28218 | 5.92832  | 2.34097  |
| O  | 19.17574 | 13.88818 | 12.97309 |
| O  | 19.72167 | 3.55179  | 4.75148  |
| O  | 15.38025 | 16.77024 | 8.85449  |
| O  | 14.96820 | 5.84732  | 1.71286  |
| O  | 10.42940 | 11.01288 | 4.78656  |
| O  | 19.74137 | 6.38898  | 12.89155 |
| O  | 14.75552 | 14.23560 | 1.79707  |
| O  | 24.05091 | 8.15382  | 8.85204  |
| O  | 22.22814 | 9.94310  | 1.76675  |
| O  | 12.19129 | 5.03947  | 8.86997  |
| O  | 21.59586 | 15.37755 | 4.79402  |

|   |          |          |          |
|---|----------|----------|----------|
| O | 12.95998 | 9.57734  | 12.83807 |
| O | 23.96161 | 11.00747 | 4.80235  |
| O | 14.78353 | 6.34768  | 12.88219 |
| O | 10.44083 | 8.01570  | 8.84517  |
| O | 19.71683 | 14.25248 | 1.76362  |
| O | 15.37215 | 13.87440 | 12.90358 |
| O | 14.77361 | 3.40859  | 4.92685  |
| O | 19.72679 | 5.62559  | 1.80050  |
| O | 19.09507 | 16.70117 | 8.84210  |
| O | 12.12814 | 10.03128 | 1.86215  |
| O | 22.21863 | 4.91753  | 8.85516  |
| O | 21.52892 | 9.55613  | 12.83744 |
| O | 12.90896 | 15.31265 | 4.81261  |
| O | 10.42756 | 8.02876  | 1.37327  |
| O | 4.99694  | 2.87716  | 4.39213  |
| O | 6.70482  | 3.86621  | 7.15165  |
| O | 12.29700 | 4.95925  | 1.28806  |
| O | 8.55487  | 9.14342  | 4.43341  |
| O | 10.28472 | 1.78890  | 1.28514  |
| O | 6.90047  | 1.77156  | 1.29301  |
| O | 8.56172  | 7.12292  | 7.16563  |
| O | 6.72416  | 8.00693  | 1.30655  |
| O | 10.43426 | 3.86465  | 7.24313  |
| O | 12.20603 | 2.93328  | 4.39349  |
| O | 4.98976  | 5.04924  | 1.26972  |
| O | 19.03646 | 3.06845  | 2.22209  |
| O | 17.25211 | 15.72245 | 13.28834 |
| O | 17.26622 | 17.70694 | 10.50696 |
| O | 15.41601 | 3.25642  | 2.31539  |
| O | 12.24329 | 7.03833  | 13.28217 |
| O | 22.27333 | 14.83445 | 2.26104  |
| O | 23.99341 | 11.88894 | 2.28651  |
| O | 10.44388 | 6.00305  | 10.62717 |
| O | 12.19020 | 14.86146 | 2.29204  |
| O | 24.01898 | 6.04827  | 10.48372 |
| O | 22.30700 | 7.02913  | 13.30551 |
| O | 10.38945 | 11.99140 | 2.26334  |
| O | 17.26663 | 12.18869 | 13.76630 |
| O | 21.49455 | 5.31440  | 3.78610  |
| O | 17.23078 | 16.99055 | 6.94091  |
| O | 13.22870 | 5.36262  | 3.96437  |
| O | 11.06223 | 8.59749  | 3.85933  |
| O | 19.13049 | 8.85530  | 13.76531 |
| O | 15.31344 | 15.91160 | 3.79350  |

|   |          |          |          |
|---|----------|----------|----------|
| O | 23.32487 | 6.41261  | 6.94148  |
| O | 23.34605 | 8.60209  | 3.79504  |
| O | 11.08047 | 6.38504  | 6.83774  |
| O | 19.18506 | 15.94066 | 3.77615  |
| O | 15.33778 | 8.81678  | 13.77931 |
| O | 27.77191 | 16.03687 | 3.92793  |
| O | 19.72500 | 16.34623 | 13.89482 |
| O | 32.04861 | 18.48332 | 10.79986 |
| O | 23.94990 | 9.00028  | 13.89321 |
| O | 27.85772 | 8.97298  | 13.85539 |
| O | 24.01822 | 16.03666 | 3.80841  |
| O | 32.03995 | 16.28909 | 13.89746 |
| O | 19.79321 | 18.42352 | 10.77081 |
| O | 21.66801 | 19.57599 | 13.90898 |
| O | 25.89028 | 7.88605  | 10.77890 |
| O | 30.11112 | 19.56456 | 13.87905 |
| O | 25.84071 | 12.73752 | 3.98868  |
| O | 19.76170 | 11.38710 | 13.44815 |
| O | 21.53921 | 4.56884  | 6.33645  |
| O | 14.74360 | 16.36088 | 6.34165  |
| O | 12.94422 | 7.62214  | 2.27323  |
| O | 10.37719 | 8.91767  | 6.38737  |
| O | 17.25021 | 7.03962  | 13.34451 |
| O | 17.24520 | 14.92408 | 2.28242  |
| O | 23.99319 | 8.88839  | 6.34539  |
| O | 21.55481 | 7.45255  | 2.22614  |
| O | 12.91515 | 4.47926  | 6.44011  |
| O | 19.72499 | 16.39168 | 6.31491  |
| O | 14.78666 | 11.37195 | 13.37075 |
| O | 17.24597 | 2.89654  | 4.21847  |
| O | 19.09601 | 15.94454 | 11.35561 |
| O | 15.40583 | 15.98283 | 11.35787 |
| O | 17.29951 | 4.86893  | 1.28240  |
| O | 11.12189 | 8.48848  | 11.31900 |
| O | 23.35249 | 13.51566 | 4.32120  |
| O | 21.55246 | 12.43184 | 1.30783  |
| O | 12.92838 | 5.30304  | 11.36066 |
| O | 12.88345 | 12.45967 | 1.35407  |
| O | 23.39997 | 8.50786  | 11.36376 |
| O | 21.57940 | 5.34202  | 11.35327 |
| O | 11.07753 | 13.50266 | 4.33742  |
| H | 15.93416 | 7.00363  | 1.94746  |
| H | 24.38205 | 15.14967 | 12.70564 |
| H | 14.11085 | 9.02612  | 0.98164  |

|   |          |          |          |
|---|----------|----------|----------|
| H | 23.46357 | 16.13363 | 13.99231 |
| H | 23.75685 | 13.04400 | 13.88203 |
| H | 16.86405 | 9.86760  | 1.53398  |
| H | 16.74345 | 7.45499  | 3.31249  |
| H | 15.51786 | 9.48650  | 2.74618  |
| H | 17.72633 | 7.54155  | 1.75240  |
| C | 14.80948 | 9.03123  | 0.14481  |
| C | 23.78437 | 15.15840 | 13.61916 |
| C | 16.79965 | 7.80638  | 2.26667  |
| C | 16.33765 | 9.12138  | 2.12328  |
